# Supplementary material for: Frequency of exercise-induced ST-T-segment deviations and cardiac arrhythmias in recreational endurance athletes during a marathon race: results of the prospective observational Berlin Beat of Running study
Source: PubMed Central journal article supplement — BMJ Open. 2017 Aug 3;7(8):e015798. doi: 10.1136/bmjopen-2016-015798 (PMC5629744; doi:10.1136/bmjopen-2016-015798), 2017-08-03
Supplement: bmjopen-2016-015798.draft_revisions.pdf [file bmjopen-2016-015798.draft_revisions.pdf]

# BMJ Open

## Exercise-induced ST-segment deviations and cardiac arrhythmias in leisure endurance athletes during a marathon race: Results of the Berlin Beat of Running study

|                                 |                                                                                                                                                                                                                                                                                                                                                                                                                                                                                                                                                                                                                                                                                                                                                                                                                                                                                                                                                                                                                                                                                                                                              |
|---------------------------------|----------------------------------------------------------------------------------------------------------------------------------------------------------------------------------------------------------------------------------------------------------------------------------------------------------------------------------------------------------------------------------------------------------------------------------------------------------------------------------------------------------------------------------------------------------------------------------------------------------------------------------------------------------------------------------------------------------------------------------------------------------------------------------------------------------------------------------------------------------------------------------------------------------------------------------------------------------------------------------------------------------------------------------------------------------------------------------------------------------------------------------------------|
| Journal:                        | <i>BMJ Open</i>                                                                                                                                                                                                                                                                                                                                                                                                                                                                                                                                                                                                                                                                                                                                                                                                                                                                                                                                                                                                                                                                                                                              |
| Manuscript ID                   | bmjopen-2016-015798                                                                                                                                                                                                                                                                                                                                                                                                                                                                                                                                                                                                                                                                                                                                                                                                                                                                                                                                                                                                                                                                                                                          |
| Article Type:                   | Research                                                                                                                                                                                                                                                                                                                                                                                                                                                                                                                                                                                                                                                                                                                                                                                                                                                                                                                                                                                                                                                                                                                                     |
| Date Submitted by the Author:   | 30-Dec-2016                                                                                                                                                                                                                                                                                                                                                                                                                                                                                                                                                                                                                                                                                                                                                                                                                                                                                                                                                                                                                                                                                                                                  |
| Complete List of Authors:       | Herm, Juliane; Charite Universitätsmedizin Berlin, Department of Neurology<br>Toepper, Agnieszka; , Experimental and Clinical Research Center, Berlin, Germany, Working Group on Cardiovascular Magnetic Resonance<br>Wutzler, Alexander; Charite Universitätsmedizin Berlin,<br>Kunze, Claudia; Charite Universitätsmedizin Berlin, Center for Stroke Research Berlin<br>Kruell, Matthias; SMS Medical Institute Berlin GmbH<br>Brechtel, Lars; SMS Medical Institute Berlin GmbH<br>Lock, Juergen; SMS Medical Institute Berlin GmbH<br>Fiebach, Jochen; Charite Universitätsmedizin Berlin, Center for Stroke Research Berlin (CSB)<br>Heuschmann, Peter; Julius-Maximilians-Universität Würzburg Institut für deutsche Philologie, Institute of Clinical Epidemiology and Biometry<br>Haverkamp, Wilhelm; Charité Berlin, Department of Cardiology<br>Endres, Matthias; Charité-Universitätsmedizin Berlin, Center for Stroke Research Berlin<br>Jungehulsing, Gerhard; Charite Universitätsmedizin Berlin, Center for Stroke Research Berlin (CSB)<br>Haeusler, Karl Georg; Charite Universitätsmedizin Berlin, Department of Neurology |
| <b>Primary Subject Heading</b>: | Sports and exercise medicine                                                                                                                                                                                                                                                                                                                                                                                                                                                                                                                                                                                                                                                                                                                                                                                                                                                                                                                                                                                                                                                                                                                 |
| Secondary Subject Heading:      | Cardiovascular medicine                                                                                                                                                                                                                                                                                                                                                                                                                                                                                                                                                                                                                                                                                                                                                                                                                                                                                                                                                                                                                                                                                                                      |
| Keywords:                       | marathon, ecg, Magnetic resonance imaging < RADIOLOGY & IMAGING, arrhythmia, troponin                                                                                                                                                                                                                                                                                                                                                                                                                                                                                                                                                                                                                                                                                                                                                                                                                                                                                                                                                                                                                                                        |
|                                 |                                                                                                                                                                                                                                                                                                                                                                                                                                                                                                                                                                                                                                                                                                                                                                                                                                                                                                                                                                                                                                                                                                                                              |

SCHOLARONE™  
Manuscripts

1  
2  
3 **Exercise-induced ST-segment deviations and cardiac arrhythmias in leisure endurance**  
4 **athletes during a marathon race: Results of the Berlin Beat of Running study**

5  
6  
7 Juliane Herm, MD<sup>1,2</sup>, Agnieszka Töpper, MD<sup>3-5</sup>, Alexander Wutzler, MD<sup>5</sup>, Claudia Kunze<sup>2</sup>,  
8  
9 Matthias Krüll, MD<sup>6,7,8</sup>, Lars Brechtel, MD<sup>6,7,8</sup>, Jürgen Lock, MD<sup>6,7,8</sup>, Jochen B. Fiebach,  
10  
11 MD<sup>2</sup>, Peter U. Heuschmann, MD<sup>9,10</sup>, Wilhelm Haverkamp, MD<sup>5</sup>, Matthias Endres, MD<sup>1,2,11</sup>,  
12  
13 Gerhard Jan Jungehulsing, MD<sup>2,12\*</sup>, Karl Georg Haeusler, MD, FESC<sup>1,2\*</sup>  
14  
15

16  
17  
18 <sup>1</sup>Department of Neurology, Charité - Universitätsmedizin Berlin, Germany; <sup>2</sup>Center for Stroke  
19  
20 Research Berlin, Charité - Universitätsmedizin, Berlin, Germany; <sup>3</sup>Working Group on  
21  
22 Cardiovascular Magnetic Resonance, Experimental and Clinical Research Center, Berlin,  
23  
24 Germany; <sup>4</sup>HELIOS Klinikum Berlin Buch, Department of Cardiology and Nephrology,  
25  
26 Berlin, Germany; <sup>5</sup>Department of Cardiology, Campus Virchow-Klinikum, Charité, Berlin,  
27  
28 Germany; <sup>6</sup>SMS Medical Institute Berlin GmbH, Germany; <sup>7</sup>SCC EVENTS GmbH Berlin,  
29  
30 Germany; <sup>8</sup>Berlin Academy of Sports Medicine, Germany; <sup>9</sup>Institute of Clinical  
31  
32 Epidemiology and Biometry, University of Würzburg, Germany; <sup>10</sup>Clinical Trial Center  
33  
34 Würzburg, University Hospital Würzburg, Germany; <sup>11</sup>German Center for Neurodegenerative  
35  
36 Diseases (DZNE) & German Center for Cardiovascular Diseases (DZHK), Partner Site,  
37  
38 Berlin, Germany; <sup>12</sup>Department of Neurology, Jüdisches Krankenhaus Berlin, Germany  
39  
40

41 \* Authors contributed equally

42  
43  
44 Short title: ECG changes during a marathon race

45  
46 Corresponding author: Karl Georg Häusler, MD, FESC

47  
48 Charité - Universitätsmedizin Berlin, Campus Benjamin  
49  
50 Franklin

51  
52 Hindenburgdamm 30, 12203 Berlin, Germany

53  
54 Phone +49-30-450560663 FAX +49-30-450560979

55  
56  
57 georg.haeusler@charite.de  
58  
59

Herm et al., ECG changes during a marathon race

## Abstract

*Introduction* The “Berlin Beat of Running” study focused on ECG-monitoring during strenuous exercise. *Methods and Results* Experienced marathon runners wore a portable electrocardiogram (ECG) recorder during a marathon race, and underwent blood tests 2-3 days prior, directly after and 1-2 days afterwards. Overall, 108 athletes (median 48 years (IQR 45-53), 24% female) completed the marathon in 249±43 min. Blinded ECG-analysis revealed abnormal findings during the marathon in 18 (16.8%) athletes. Ten (9.3%) athletes had at least one episode of non-sustained ventricular tachycardia, one of whom had atrial fibrillation; eight (7.5%) individuals showed transient ST-segment deviations. Abnormal ECG-findings were associated with finishing time (OR 1.70 per 30 minutes [95%CI 1.18-2.43]) and advanced age (OR 1.15 per year [95%CI 1.05-1.27]); sex and cardiovascular risk profile had no impact. Directly after the race, high-sensitive troponin T was elevated in 18 (16.7%) athletes and associated with ST-segment deviation (OR 11.0 [95%CI 2.35-51.7]) and a longer marathon finishing time (OR 1.5 per 30 minutes [95%CI 1.03-2.07]), while age, sex and cardiovascular risk profile had no impact.

*Conclusion* ECG-monitoring during a marathon is feasible. Abnormal ECG-findings were present in every sixth athlete. Exercise-induced transient ST-segment deviations were associated with elevated hsTnT values.

*Trial registration:* [clinicaltrials.gov NCT01428778](http://clinicaltrials.gov/NCT01428778).

*Keywords:* Marathon – ECG – magnetic resonance imaging – arrhythmia – troponin

Herm et al., ECG changes during a marathon race

### Strengths and limitations of this study

- An electrocardiogram was recorded during a marathon race in 108 athletes.
- Serial blood testing was performed prior, directly after and 1-2 days after the race and included high-sensitive troponin.
- Cardiac MRI was done in a subset of participants with abnormal findings but echocardiography would have allowed for further conclusions.

## Introduction

Regular physical exercise has many health benefits: Improving blood pressure control, insulin sensitivity and lipid profiles, it reduces overall mortality and disability [7] and the number of cardiovascular events [25,29]. Moreover, regular physical exercise also reduces the risk of certain cancers [33] and the number of mood disorders [5]. However, highly strenuous physical exercise may have a negative impact on cardiovascular health [22]. While marathon running has become a popular sport, cardiac arrest is rare but occurs in about 1:100,000 marathon runners, most commonly in those with hypertrophic cardiomyopathy or atherosclerotic coronary disease [21]. Available data on incidence of myocardial infarction after running a marathon is limited to case reports [3], but elevated levels of troponin – a sensitive biomarker of cardiac injury – were reported in a relevant subset of asymptomatic marathon runners [9,11,24]. Other potentially harmful effects of strenuous exercise, like right ventricular dysplasia and ventricular arrhythmia, have also been reported for triathletes and other ultra-endurance athletes [18,19,26]. Moreover, a meta-analysis of mostly retrospective and small case-control series as well as a recent cohort study indicated that intense endurance sport increases the long-term risk of atrial fibrillation [2,4]. The EHRA consortium has recently updated its recommendations regarding abnormal ventricular arrhythmias in endurance athletes and stated that a non-sustained ventricular tachycardia (nsVT) requires diagnostic evaluation for latent hypertrophic cardiomyopathy or ischemic heart disease, especially if these occur under physical exercise [27]. However, there are very few publications regarding cardiac arrhythmias occurring during endurance sport so far [1,12,15,23].

Herewith, we report the results of the “Berlin Beat of Running” study, demonstrating feasibility of continuous ECG-monitoring in 108 leisure endurance athletes during a marathon race. We focus on the frequency of cardiac arrhythmias and ST-segment deviations.

Herm et al., ECG changes during a marathon race

## Methods

### *Study design*

The “Berlin Beat of Running” study is a prospective, observational, investigator-initiated study. The study design has been published in detail [17]. In short, all pre-registered participants were informed by the organizers of the marathon about the study, and they contacted the study personnel if they were interested. Participants aged 35-60 years with at least 2 marathon runs within the last 5 years and an average training of 40 km running per week were enrolled after giving written informed consent. Exclusion criteria included known cardiac disease or arrhythmia, prior stroke, tumor or infectious disease, severe liver or kidney disease, hyperthyroidism, pregnancy or lactation. Continuous ECG recording (using the CardioMem<sup>®</sup> CM 4000 provided by GETEMED AG, Teltow, Germany) was started in 109 study patients at up to 74 hours before the 38<sup>th</sup> BMW BERLIN MARATHON and continued throughout the entire race and for up to 58 hours afterwards. Laboratory assessment including hsTnT measurement with chemiluminescence immunoassays (Roche Diagnostics, Mannheim, Germany; cut-off 0.012 µg/l) was performed at up to 74 hours before, within 30 minutes post-race, and for up to 58 hours after the race. The study protocol is in accordance with the Helsinki declaration and was approved by the Ethics Committee of the Charité - Universitätsmedizin Berlin (EA4/042/11).

### *MRI analysis*

A cardiac MRI after the race was offered to all study participants with either ST-segment deviation or hsTnT elevation. 3T MRI (Magnetom Tim Trio; Siemens AG, Erlangen, Germany) was performed using a phased array receiver coil during breath-holds gated to the electrocardiogram (Body Matrix-coil #TATS; Siemens AG). Cine images of 3 long-axis and 14-18 short-axis views (slices of 4 mm) were created using a steady state free precision

Herm et al., ECG changes during a marathon race

1  
2  
3  
4 technique [6]. Eight minutes after i.v. administration of 10-12 ml Gadovist<sup>®</sup> (Bayer Schering  
5  
6 Pharma AG, Berlin, Germany) at a concentration of 1 mmol/ml, these views were repeated  
7  
8 using a short inversion recovery sequence and continuously adjusting the inversion time [28].  
9

### 10 11 12 ***ECG analysis***

13  
14 ECG monitoring was performed using the two-channel portable ECG recorder (CardioMem<sup>®</sup>  
15  
16 CM 4000; GETEMED AG, Teltow, Germany). The cardiologists (AT, AW, WH), who  
17  
18 analyzed the ECG data, were blinded for demographic, clinical or laboratory data. As there  
19  
20 are no published recommendations on interpretation of a Holter-ECG in athletes, we took into  
21  
22 consideration recommendations available for interpreting a 12-lead ECG in athletes (Drezner  
23  
24 et al. 2013) as well as recent EHRA guidelines on ventricular arrhythmias [27]. In line with  
25  
26 this, we defined an abnormal ECG as presence of ST-segment deviation under physical  
27  
28 exercise or arrhythmias. The ST-segment was considered abnormal in the 2-lead ECG if  
29  
30 horizontal or down-sloping occurred over the 60 ms after the J-junction (80 ms if the heart  
31  
32 rate was <120 beats/min) [16]. Episodes lasting more than 30 seconds preceded and followed  
33  
34 by regular ECG recording were also considered abnormal. Drezner et al. defined atrial  
35  
36 arrhythmias as atrio-ventricular (AV) block grade IIb or III, atrial fibrillation or  
37  
38 supraventricular tachycardia (SVT) [8]. Ventricular arrhythmias were defined as nsVT of at  
39  
40 least three premature ventricular complexes (PVC) and a heart rate of  $\geq 100$  beats per minute  
41  
42 [8,27].  
43  
44  
45  
46  
47  
48  
49

### 50 51 ***Statistical analysis***

52 In accordance with the sample size calculation, we planned to include 110 participants into  
53  
54 the study [17]. For categorical data, absolute and relative frequencies were calculated using  
55  
56 SPSS statistics 22. In the case of continuous variables with nearly normal distribution, we  
57  
58  
59

Herm et al., ECG changes during a marathon race

1  
2  
3  
4 used the arithmetic mean, standard deviation, minimal and maximal values, otherwise  
5  
6 median, quartiles, minimal and maximal values. The *Chi* quadrat test was used to compare  
7  
8 proportions for dichotomous outcomes between independent groups or to test independency  
9  
10 of two dichotomous variables within a population. Outcomes in an ordinal scale or continuous  
11  
12 outcomes were analyzed using the t-test or the Mann-Whitney test, depending on normality or  
13  
14 non-normality of distribution. Odds ratios for estimating the probability of abnormal ECG  
15  
16 findings were calculated by univariate logistic regression analyses. A p value of <0.05 was  
17  
18 considered to be statistically significant.  
19  
20  
21  
22

## 23 **Results**

### 24 ***Baseline data of study participants and feasibility of ECG recording***

25  
26 Overall, 109 (99.1%) of 110 study participants took part, and 108 (98.2%) participants  
27  
28 finished the 38<sup>th</sup> BMW BERLIN MARATHON 2011 in an average running time of 249±43  
29  
30 min. September 25, 2011, was a sunny day in Berlin and temperatures reached a maximum of  
31  
32 22 degrees Celsius. Data quality of long-term Holter-ECG was sufficient to ensure assessment  
33  
34 of arrhythmias and ST-segment deviations in 107 (98.2%) athletes. In one athlete, a technical  
35  
36 error occurred. Consistently wearing the ECG recorder on the upper arm using a carrier bag,  
37  
38 the other athletes reported no problems in this regard. Baseline characteristics of those 107  
39  
40 participants are depicted in **Table 1**. The median age of these 107 participants was 48 years;  
41  
42 23.9% were female. The cardiovascular risk profile was low. The participants had attended a  
43  
44 median of 5 marathon races within the last 5 years and a median of 8 marathon races in total.  
45  
46 Their average weekly running distance prior to the race was 40 km (IQR 30-50 km). In  
47  
48 addition, athletes regularly went cycling (44.9%; n=48); or swimming (18.7%; n=20),  
49  
50 respectively.  
51  
52  
53  
54  
55  
56  
57  
58  
59  
60



Herm et al., ECG changes during a marathon race

### ***Cardiac arrhythmias or ST-segment deviation during the marathon***

During the race, mean heart rate was in  $156.7 \pm 9.4$  beats per minute. Minimum and maximum median heart rate were 133 (IQR 120-142) and 172 (IQR 166-177) beats per minute, respectively. We observed nsVT in 10 (9.4%) athletes (**Figure 1**), 2 (20%) of those athletes were female. We did not observe an AV block or a SVT. Atrial fibrillation was found in one male patient (0.9%). Filtering of the monitors allowed interpretation of ST-T wave changes in fashion similar to a standard ECG. Exercise-induced ST-segment deviations occurred in eight (7.5%) study participants during the marathon race (**Figure 2**), 2 (25%) of those athletes were female. One of those eight athletes also had nsVT. While four (3.7%) athletes reported palpitations during the marathon race, one of them had AF. No athlete reported cardiac pain or dyspnea.

An abnormal ECG according to pre-defined criteria was found in 16.8% (n=18) of all participants (**Table 2**). In univariate analysis, advanced age (OR 1.15 per year [95%CI 1.05-1.27]; p=0.004) and a longer marathon finishing time (OR 1.70 per 30 minutes [95%CI 1.18-2.43]; p=0.009) were associated with abnormal ECG findings, while sex, cardiovascular risk profile, hematocrit post-race and the number of previous marathons were not. In addition, athletes with an abnormal ECG had a higher frequency of PVCs (median 3.0 (IQR 1.0-12.3) versus 23.5 (IQR 10.0-44.0), p<0.001) during the marathon race.

### ***Cardiac biomarkers and ECG changes during the marathon***

At baseline, hsTNT was normal in all marathon runners (<0.050  $\mu\text{g/l}$ ). Within minutes after the race had finished, hsTNT was elevated above 0.050  $\mu\text{g/l}$  in 18 (16.8%) of participants and median hsTNT was 0.03  $\mu\text{g/l}$  (IQR 0.02-0.04; range 0.01-0.22). CK and CK-MB were 130 U/l (IQR 103–176) and 20 U/l (IQR 17–24) pre-marathon, respectively. Post-marathon CK was 336 (IQR 252-417) U/l and CK-MB was 35 (IQR 29-41).

Herm et al., ECG changes during a marathon race

1  
2  
3  
4 Comparing athletes with an elevated hsTNT post-marathon to those without, we found no  
5  
6 difference in age, sex, cardiovascular risk factors, training level or post-marathon CK-MB  
7  
8 values (**Table 3**). In runners with elevated hsTNT, we found more frequent ST-segment  
9  
10 deviations (OR 11.0 [95%CI 2.35-51.7];  $p < 0.0001$ ) but no association with cardiac  
11  
12 arrhythmias. In addition, elevated hsTNT was found in individuals with a longer marathon  
13  
14 finishing time (OR 1.5 per 30 minutes [95%CI 1.03-2.07];  $p = 0.040$ ). Within 48 hours post-  
15  
16 marathon, hsTNT was within normal range in 106 (99.1%) athletes; one athlete with no  
17  
18 substantial ECG alterations during the marathon showed a persisting hsTNT elevation but  
19  
20 normal 12-lead ECG post-marathon.  
21  
22  
23  
24

### ***Cardiac MRI in athletes with ST-segment deviation or elevated hsTNT***

25  
26 Cardiac MRI was offered to all study participants with ST-segment deviation or hsTNT  
27  
28 elevation. Five out of eight athletes with ST-segment deviation as well as in five out of 18  
29  
30 athletes with hsTnT elevation underwent MRI within 10-42 days after the marathon race.  
31  
32 Age, gender and cardiovascular risk factors did not differ in those 10 athletes undergoing  
33  
34 cardiac MRI and those 14 athletes how did not undergo cardiac MRI. Cardiac MRI revealed  
35  
36 no pathological findings for cardiac function and there was no late gadolinium enhancement,  
37  
38 indicating myocardial fibrosis. Additional cardiac work-up was strongly recommended in all  
39  
40 patients with pathological ECG-findings.  
41  
42  
43  
44  
45  
46  
47  
48

### **Discussion**

49  
50  
51 This is the so far largest study demonstrating feasibility of ECG recording during a marathon  
52  
53 race, which may help counseling a subset of endurance athletes regarding exercise-associated  
54  
55 complications. One main finding of the “Berlin Beat of Running” study is the unexpectedly  
56  
57  
58  
59  
60

Herm et al., ECG changes during a marathon race

1  
2  
3 high rate of abnormal ECG findings in 17% of leisure endurance athletes. Moreover, this is  
4 the first study reporting an association of transient ST-segment abnormalities during a  
5  
6 the first study reporting an association of transient ST-segment abnormalities during a  
7  
8 marathon with elevated hsTNT levels after finishing the race.  
9

10 So far, there is limited data on ECG abnormalities during vigorous exercise [30]. Franco et al.  
11 reported “no arrhythmias” in 19 male athletes during a marathon [12], while Aagaard et al.  
12 found “no ventricular arrhythmias” but atrial fibrillation in two (4%) of 49 male endurance  
13 runners during a 30 km race [1]. Luurila et al. reported the presence of ventricular premature  
14 complexes in 33 (89%) of 37 recreational athletes during a ski marathon as well as ST-  
15 segment deviations in 3 (8%) of these middle-aged men [23]. Most recently, Grabs et al. used  
16 a 1-lead wireless ECG and reported premature atrial contractions but no arrhythmias in 20  
17 male runners during a marathon race [15]. In our prospective study, 10 (9.4%) out of 107  
18 leisure endurance athletes had a non-sustained ventricular arrhythmia during the marathon and  
19 one (0.9%) athlete had AF. In addition, ST-segment deviations (**Figure 2**) were detected in 8  
20 (7.5%) athletes. Advanced age or longer marathon finishing time was associated with  
21 abnormal ECG findings (**Table 2**). According to the hematocrit, the hydration status –  
22 potentially impacting on cardiac preload – was not linked to these findings.  
23  
24  
25  
26  
27  
28  
29  
30  
31  
32  
33  
34  
35  
36  
37

38 Despite the fact that increased levels of physical activity were associated with a lower relative  
39 risk of myocardial infarction, 4% of patients with myocardial infarction report having  
40 performed strenuous exercise within hours before the cardiovascular event [25]. By using  
41 different cut-offs, transient elevations in the level of troponin T or troponin I has previously  
42 been reported in 18-69% of marathon runners [9,11,14,24]. In the “Berlin Beat of Running”  
43 cohort, hsTNT was elevated in 18 (17%) out of 107 athletes but normalized within 48 hours  
44 in 17 (94%) of those. Interestingly, elevation of hsTNT was not related to age, sex, training  
45 status, the cardiovascular risk profile or the presence of cardiac arrhythmias during the race,  
46  
47  
48  
49  
50  
51  
52  
53  
54  
55  
56  
57  
58  
59  
60

Herm et al., ECG changes during a marathon race

1  
2  
3  
4 but was related to exercise-induced ST-segment deviation ( $p<0.0001$ ) and longer marathon  
5  
6 finishing time ( $p=0.040$ ).

7  
8 Cardiac magnetic resonance imaging (MRI) is now the gold standard for detecting myocardial  
9  
10 damage [31] and myocardial edema as well as decreased ventricular function after a marathon  
11  
12 race [13,20]. We were not able to demonstrate late gadolinium enhancement as an indicator of  
13  
14 permanent myocardial fibrosis in ten experienced but leisure athletes with ST-segment  
15  
16 deviation or detected cardiac arrhythmia. This is in line with a previous study reporting no  
17  
18 late gadolinium enhancement in 20 leisure athletes within 48 hours after a marathon race [13].  
19  
20 Interestingly, a transient cardiac edema was reported in 17 (85%) out of 20 marathon runners  
21  
22 [13], but no correlation was reported between biomarkers and cardiac edema. As cardiac MRI  
23  
24 was performed at later time points after the race in our study, we are unable to confirm a  
25  
26 transient cardiac edema in marathon runners.  
27  
28

29  
30 Taken together, vigorous exercise can go along with transient troponin elevation, ST-segment  
31  
32 alterations or nsVT. However, these findings are likely to be benign in the absence of  
33  
34 structural heart disease or obstructive coronary artery disease, which should be excluded in  
35  
36 these athletes. Whether borderline cardiac damage by repetitive strenuous exercise could lead  
37  
38 to permanent (potentially arrhythmogenic) cardiac remodeling is under debate [22,32].  
39

40  
41 Major limitations of the observational “Berlin Beat of Running” study, as it focused primary  
42  
43 on the feasibility of portable ECG monitoring and detection of ECG changes during the race,  
44  
45 are the missing echocardiography or cardiac stress MRI, limiting the clinical significance of  
46  
47 the observed ST-segment changes and elevated hsTNT levels. Since only 25% of all athletes  
48  
49 were female, the generalizability of our results is limited. Moreover, a valid multivariate  
50  
51 analysis was not possible due to the limited number of participants, which was due to the  
52  
53 complex nature of the study. In addition, there is a subsequent selection bias. Finally, exercise  
54  
55 capacity testing would have allowed more accurate evaluation of training status.  
56  
57  
58  
59

Herm et al., ECG changes during a marathon race

## Conclusion

ECG recording during a marathon race is feasible, which may be helpful in the diagnostic work-up of selected athletes. Cardiac arrhythmias or exercise-induced ST-segment deviations appear in a relevant subset of experienced leisure athletes during a marathon race, predominantly in older and athletes who are less fit. Marathon-induced ST-segment deviations were associated with elevated hsTnT values immediately after the race. Cardiac MRI detected no myocardial fibrosis by late gadolinium enhancement in a subset of these athletes.

Herm et al., ECG changes during a marathon race

### List of abbreviations

atrial fibrillation, AF; AV, atrio-ventricular; CK, creatine kinase; CK-MB, myocardium- and brain-specific CK; electrocardiogram, ECG; hsTnT, high-sensitive troponin T; magnetic resonance imaging, MRI; SVT, supraventricular tachycardia; Tesla, T; non-sustainable ventricular tachycardia, nsVT.

### Funding

The investigator-initiated “Berlin Beat of Running” study was supported by the SCC EVENTS GmbH, Berlin. Bayer Healthcare (Leverkusen, Germany) and Sanofi-Aventis Deutschland GmbH (Berlin, Germany) supported the study with an unrestricted grant. The GETEMED AG (Teltow, Germany) provided the ECG-recorders and comprehensive technical support. KGH, JH, CK, JBF, ME and GJJ received funding from the Federal Ministry of Education and Research via the grant Center for Stroke Research Berlin (01 EO 0801). ME received support from the Volkswagen-Stiftung, Deutsche Forschungsgemeinschaft and the EU.

### Acknowledgement

The results of the present study are presented clearly, honestly, and without fabrication, falsification, or inappropriate data manipulation, and statement that results of the present study do not constitute endorsement by ACSM. We appreciate the work of the organizing SCC EVENTS GmbH who supported the “Berlin Beat of Running” study in an outstanding manner. We would like to thank all members of the “Berlin Beat of Running” study team [17] and all athletes for their participation. In addition, we thank Catherine Aubel (CSB) and Julia Herde (CSB) for critically reviewing the manuscript.

Herm et al., ECG changes during a marathon race

### Competing interests

JH reports no conflict of interest. AT reports lecture fees from the Circle Institute. MK received consulting, lecture and advisory board fees from ALK, Berlin Chemie, Novartis, Mundipharma and Teva. LB reports research support from German Ministry of Research and Education. JBF reports the following board memberships, consultancies and/or payments for lectures including service on speaker's bureaus: Boehringer-Ingelheim, Lundbeck, BioClinica and Parexel. PUH reports research grants from the German Ministry of Research and Education, EU, Charité, Berlin Chamber of Physicians, German Parkinson Society, University Hospital Würzburg, Robert-Koch-Institute, Charité-Universitätsmedizin Berlin (within MonDAFIS; MonDAFIS is supported by an unrestricted research grant to the Charité from Bayer Healthcare), University Göttingen (within FIND-AF<sub>randomized</sub>; FIND-AF<sub>randomized</sub> is supported by an unrestricted research grant to the University Göttingen from Boehringer-Ingelheim), and University Hospital Heidelberg (within RASUNOA-prime; RASUNOA-prime is supported by an unrestricted research grant to the University Hospital Heidelberg from Bayer Healthcare, BMS, Boehringer-Ingelheim), outside submitted work. GJJ has received funding from the German Ministry for Education and Research. He has served on the Critical Event committees of the SourceXT registry and the ProTAVI-C-study (Edwards Lifesciences, USA). He serves as a consultant for Cipio Partners (Munich, Germany and Elron, Tel Aviv, Israel). He has received speakers honoraria from Genzyme and Pfizer (2010-2013). ME and KGH report lecture fees and study grants from Sanofi-Aventis and Bayer Healthcare.

### Author's contribution

JH has made substantial contributions to acquisition, analysis and interpretation of data and drafted the manuscript. AT and AW have made substantial contributions to data analysis and

Herm et al., ECG changes during a marathon race

1  
2  
3  
4 interpretation of data. CK has made substantial contributions to design and acquisition of  
5  
6 data. MK, LB, JL, JBF, WH and ME revised the manuscript critically for important  
7  
8 intellectual content. PUH has made substantial contributions to analysis and interpretation of  
9  
10 data and revised the manuscript critically for important intellectual content. GJJ has made  
11  
12 substantial contributions to conception and design and revised the manuscript critically for  
13  
14 important intellectual content. KGH has made substantial contributions to conception and  
15  
16 design, analysis and interpretation of data and drafted the manuscript.  
17  
18  
19  
20  
21  
22  
23  
24  
25  
26  
27  
28  
29  
30  
31  
32  
33  
34  
35  
36  
37  
38  
39  
40  
41  
42  
43  
44  
45  
46  
47  
48  
49  
50  
51  
52  
53  
54  
55  
56  
57  
58  
59  
60



Herm et al., ECG changes during a marathon race

## References

- 1 *Aagaard P, Sahlén A, Bergfeldt L, Braunschweig F.* Heart rate and its variability in response to running-associations with troponin. *Med Sci Sport Exerc* 2014; 46: 1624–1630 Available from: <http://www.ncbi.nlm.nih.gov/pubmed/24504429>
- 2 *Abdulla J, Nielsen JR.* Is the risk of atrial fibrillation higher in athletes than in the general population? A systematic review and meta-analysis. *Europace* 2009; 11: 1156–1159 Available from: <http://www.ncbi.nlm.nih.gov/pubmed/19633305>
- 3 *Albano AJ, Thompson PD, Kapur NK.* Acute coronary thrombosis in Boston marathon runners. *N Engl J Med* 2012; 366: 184–185 Available from: <http://www.ncbi.nlm.nih.gov/pubmed/22236231>
- 4 *Andersen K, Farahmand B, Ahlbom A, Held C, Ljunghall S, Michaëlsson K, Sundström J.* Risk of arrhythmias in 52 755 long-distance cross-country skiers: a cohort study. *Eur Hear J* 2013; 34: 3624–3631 Available from: <http://www.ncbi.nlm.nih.gov/pubmed/23756332>
- 5 *Carek PJ, Laibstain SE, Carek SM.* Exercise for the treatment of depression and anxiety. *Int J Psychiatry Med* 2011; 41: 15–28 Available from: <http://www.ncbi.nlm.nih.gov/pubmed/21495519>
- 6 *Carr JC, Simonetti O, Bundy J, Li D, Pereles S, Finn JP.* Cine MR angiography of the heart with segmented true fast imaging with steady-state precession. *Radiology* 2001; 219: 828–834 Available from: <http://www.ncbi.nlm.nih.gov/pubmed/11376278>
- 7 *Chakravarty EF, Hubert HB, Lingala VB, Fries JF.* Reduced disability and mortality among aging runners: a 21-year longitudinal study. *Arch Intern Med* 2008; 168: 1638–1646 Available from:

Herm et al., ECG changes during a marathon race

- 1  
2  
3  
4 <http://www.pubmedcentral.nih.gov/articlerender.fcgi?artid=3175643&tool=pmcentrez>  
5  
6 &rendertype=abstract  
7  
8  
9 8 *Drezner JA, Ackerman MJ, Anderson J, Ashley E, Asplund CA, Baggish AL, Börjesson*  
10 *M, Cannon BC, Corrado D, DiFiori JP, Fischbach P, Froelicher V, Harmon KG,*  
11 *Heidbuchel H, Marek J, Owens DS, Paul S, Pelliccia A, Prutkin JM, Salerno JC,*  
12 *Schmied CM, Sharma S, Stein R, Vetter VL, Wilson MG.* Electrocardiographic  
13 interpretation in athletes: the “Seattle criteria”. *Br J Sport Med* 2013; 47: 122–124  
14 Available from: <http://www.ncbi.nlm.nih.gov/pubmed/23303758>  
15  
16  
17  
18  
19  
20  
21  
22 9 *Eijsvogels TMH, Hoogerwerf MD, Maessen MFH, Seeger JPH, George KP, Hopman*  
23 *MTE, Thijssen DHJ.* Predictors of cardiac troponin release after a marathon. *J Sci Med*  
24 *Sport* 2014; 18: 88–92 Available from:  
25  
26  
27 <http://www.ncbi.nlm.nih.gov/pubmed/24440407>  
28  
29  
30  
31  
32 10 *Fletcher GF, Ades PA, Kligfield P, Arena R, Balady GJ, Bittner VA, Coke LA, Fleg JL,*  
33 *Forman DE, Gerber TC, Gulati M, Madan K, Rhodes J, Thompson PD, Williams MA.*  
34 Exercise standards for testing and training: a scientific statement from the American  
35 Heart Association. *Circulation* 2013; 128: 873–934 Available from:  
36  
37  
38  
39 <http://www.ncbi.nlm.nih.gov/pubmed/23877260>  
40  
41  
42  
43 11 *Fortescue EB, Shin AY, Greenes DS, Mannix RC, Agarwal S, Feldman BJ, Shah MI,*  
44 *Rifai N, Landzberg MJ, Newburger JW, Almond CSD.* Cardiac troponin increases  
45 among runners in the Boston Marathon. *Ann Emerg Med* 2007; 49: 137–43, 143.e1  
46 Available from: <http://www.ncbi.nlm.nih.gov/pubmed/17145114>  
47  
48  
49  
50  
51  
52  
53 12 *Franco V, Callaway C, Salcido D, McEntire S, Roth R, Hostler D.* Characterization of  
54 electrocardiogram changes throughout a marathon. *Eur J Appl Physiol* 2014; 114:  
55 1725–1735 Available from: <http://www.ncbi.nlm.nih.gov/pubmed/24832192>  
56  
57  
58  
59

Herm et al., ECG changes during a marathon race

- 1  
2  
3  
4 13 *Gaudreault V, Tizon-Marcos H, Poirier P, Pibarot P, Gilbert P, Amyot M, Rodés-*  
5 *Cabau J, Després J-P, Bertrand O, Larose E.* Transient myocardial tissue and function  
6 changes during a marathon in less fit marathon runners. *Can J Cardiol* 2013; 29: 1269–  
7 1276 Available from: <http://www.ncbi.nlm.nih.gov/pubmed/23910227>  
8  
9  
10  
11  
12  
13 14 *George K, Whyte G, Stephenson C, Shave R, Dawson E, Edwards B, Gaze D, Collinson*  
14 *P.* Postexercise left ventricular function and cTnT in recreational marathon runners.  
15 *Med Sci Sport Exerc* 2004; 36: 1709–1715 Available from:  
16 <http://www.ncbi.nlm.nih.gov/pubmed/15595291>  
17  
18  
19  
20  
21  
22 15 *Grabs V, Peres T, Zelger O, Haller B, Pressler A, Braun S, Halle M, Scherr J.*  
23 Decreased prevalence of cardiac arrhythmias during and after vigorous and prolonged  
24 exercise in healthy male marathon runners. *Am Hear J* 2015; 170: 149–155 Available  
25 from: <http://www.ncbi.nlm.nih.gov/pubmed/26093876>  
26  
27  
28  
29  
30  
31 16 *Gramatikov B, Iyer V.* Intra-QRS spectral changes accompany ST segment changes  
32 during episodes of myocardial ischemia. *J electrocardiol* 2015; 48: 115–122 Available  
33 from: <http://www.ncbi.nlm.nih.gov/pubmed/25266140>  
34  
35  
36  
37  
38  
39 17 *Haeusler KG, Herm J, Kunze C, Krüll M, Brechtel L, Lock J, Hohenhaus M,*  
40 *Heuschmann PU, Fiebach JB, Haverkamp W, Endres M, Jungehulsing GJ.* Rate of  
41 cardiac arrhythmias and silent brain lesions in experienced marathon runners: rationale,  
42 design and baseline data of the Berlin Beat of Running study. *BMC Cardiovasc Disord*  
43 2012; 12: 69 Available from:  
44 <http://www.pubmedcentral.nih.gov/articlerender.fcgi?artid=3458995&tool=pmcentrez>  
45 &rendertype=abstract  
46  
47  
48  
49  
50  
51  
52  
53  
54 18 *Harper RW, Mottram PM.* Exercise-induced right ventricular  
55 dysplasia/cardiomyopathy--an emerging condition distinct from arrhythmogenic right  
56  
57  
58  
59

Herm et al., ECG changes during a marathon race

- 1  
2  
3  
4 ventricular dysplasia/cardiomyopathy. *Hear Lung Circ* 2009; 18: 233–235 Available  
5  
6 from: <http://www.sciencedirect.com/science/article/pii/S1443950608000115>  
7  
8  
9 19 *Heidbüchel H, Hoogsteen J, Fagard R, Vanhees L, Ector H, Willems R, Van Lierde J.*  
10 High prevalence of right ventricular involvement in endurance athletes with ventricular  
11  
12 arrhythmias. Role of an electrophysiologic study in risk stratification. *Eur Hear J* 2003;  
13  
14 24: 1473–1480 Available from: <http://www.ncbi.nlm.nih.gov/pubmed/12919770>  
15  
16  
17  
18 20 *Karlstedt E, Chelvanathan A, Da Silva M, Cleverley K, Kumar K, Bhullar N, Lytwyn*  
19  
20 *M, Bohonis S, Oomah S, Nepomuceno R, Du X, Melnyk S, Zeglinski M, Ducas R,*  
21  
22 *Sefidgar M, Mackenzie S, Sharma S, Kirkpatrick ID, Jassal DS.* The impact of repeated  
23  
24 marathon running on cardiovascular function in the aging population. *J Cardiovasc*  
25  
26 *Magn Reson* 2012; 14: 58 Available from:  
27  
28 <http://www.pubmedcentral.nih.gov/articlerender.fcgi?artid=3438060&tool=pmcentrez>  
29  
30 &rendertype=abstract  
31  
32  
33  
34 21 *Kim JH, Malhotra R, Chiampas G, D'Hemecourt P, Troyanos C, Cianca J, Smith RN,*  
35  
36 *Wang TJ, Roberts WO, Thompson PD, Baggish AL.* Cardiac arrest during long-distance  
37  
38 running races. *N Engl J Med* 2012; 366: 130–140 Available from:  
39  
40 <http://www.ncbi.nlm.nih.gov/pubmed/22236223>  
41  
42  
43  
44 22 *La\_Gerche A, Heidbuchel H.* Can intensive exercise harm the heart? You can get too  
45  
46 much of a good thing. *Circulation* 2014; 130: 992–1002 Available from:  
47  
48 <http://www.ncbi.nlm.nih.gov/pubmed/25223770>  
49  
50  
51 23 *Luurila OJ, Karjalainen J, Viitasalo M, Toivonen L.* Arrhythmias and ST segment  
52  
53 deviation during prolonged exhaustive exercise (ski marathon) in healthy middle-aged  
54  
55 men. *Eur Hear J* 1994; 15: 507–513 Available from:  
56  
57 <http://www.ncbi.nlm.nih.gov/pubmed/8070478>  
58  
59

Herm et al., ECG changes during a marathon race

- 1  
2  
3  
4 24 *Mehta R, Gaze D, Mohan S, Williams KL, Sprung V, George K, Jeffries R, Hudson Z,*  
5  
6 *Perry M, Shave R.* Post-exercise cardiac troponin release is related to exercise training  
7  
8 history. *Int J Sport Med* 2012; 33: 333–337 Available from:  
9  
10 <http://www.ncbi.nlm.nih.gov/pubmed/22377942>  
11  
12  
13 25 *Mittleman MA, Maclure M, Tofler GH, Sherwood JB, Goldberg RJ, Muller JE.*  
14  
15 *Triggering of acute myocardial infarction by heavy physical exertion. Protection*  
16  
17 *against triggering by regular exertion. Determinants of Myocardial Infarction Onset*  
18  
19 *Study Investigators.* *N Engl J Med* 1993; 329: 1677–1683 Available from:  
20  
21 <http://www.ncbi.nlm.nih.gov/pubmed/8232456>  
22  
23  
24 26 *O’Keefe JH, Patil HR, Lavie CJ, Magalski A, Vogel RA, McCullough PA.* Potential  
25  
26 adverse cardiovascular effects from excessive endurance exercise. *Mayo Clin Proc*  
27  
28 2012; 87: 587–595 Available from:  
29  
30 <http://www.pubmedcentral.nih.gov/articlerender.fcgi?artid=3538475&tool=pmcentrez>  
31  
32 &rendertype=abstract  
33  
34  
35  
36 27 *Pedersen CT, Kay GN, Kalman J, Borggreffe M, Della-Bella P, Dickfeld T, Dorian P,*  
37  
38 *Huikuri H, Kim Y-H, Knight B, Marchlinski F, Ross D, Sacher F, Sapp J, Shivkumar K,*  
39  
40 *Soejima K, Tada H, Alexander ME, Triedman JK, Yamada T, Kirchhof P, Lip GYH,*  
41  
42 *Kuck KH, Mont L, Haines D, Indik J, Dimarco J, Exner D, Iesaka Y, Savelieva I.*  
43  
44 *EHRA/HRS/APHRS expert consensus on ventricular arrhythmias.* *Europace* 2014; 16:  
45  
46 1257–1283 Available from: <http://www.ncbi.nlm.nih.gov/pubmed/25172618>  
47  
48  
49  
50 28 *Simonetti OP, Kim RJ, Fieno DS, Hillenbrand HB, Wu E, Bundy JM, Finn JP, Judd*  
51  
52 *RM.* An improved MR imaging technique for the visualization of myocardial  
53  
54 infarction. *Radiology* 2001; 218: 215–223 Available from:  
55  
56 <http://www.ncbi.nlm.nih.gov/pubmed/11152805>  
57  
58  
59  
60

Herm et al., ECG changes during a marathon race

- 1  
2  
3  
4 29 *Soares-Miranda L, Siscovick DS, Psaty BM, Longstreth WT, Mozaffarian D.* Physical  
5 Activity and Risk of Coronary Heart Disease and Stroke in Older Adults. *Circulation*  
6 2016; 133: 147–155 Available from: <http://www.ncbi.nlm.nih.gov/pubmed/26538582>  
7  
8  
9  
10  
11 30 *Spethmann S, Prescher S, Dreger H, Nettelau H, Baumann G, Knebel F, Koehler F.*  
12 Electrocardiographic monitoring during marathon running: a proof of feasibility for a  
13 new telemedical approach. *Eur J Prev Cardiol* 2014; 21: 32–37 Available from:  
14  
15 <http://www.ncbi.nlm.nih.gov/pubmed/25354952>  
16  
17  
18  
19  
20 31 *Utomi V, Oxborough D, Whyte GP, Somauroo J, Sharma S, Shave R, Atkinson G,*  
21 *George K.* Systematic review and meta-analysis of training mode, imaging modality  
22 and body size influences on the morphology and function of the male athlete's heart.  
23 *Heart* 2013; 99: 1727–1733 Available from:  
24  
25 <http://www.ncbi.nlm.nih.gov/pubmed/23474689>  
26  
27  
28  
29  
30  
31 32 *Wilson M, O'Hanlon R, Prasad S, Deighan A, Macmillan P, Oxborough D, Godfrey R,*  
32 *Smith G, Maceira A, Sharma S, George K, Whyte G.* Diverse patterns of myocardial  
33 fibrosis in lifelong, veteran endurance athletes. *J Appl Physiol* 2011; 110: 1622–1626  
34 Available from:  
35  
36 <http://www.pubmedcentral.nih.gov/articlerender.fcgi?artid=3119133&tool=pmcentrez>  
37  
38  
39  
40  
41  
42  
43 &rendertype=abstract  
44  
45 33 *Winzer BM, Whiteman DC, Reeves MM, Paratz JD.* Physical activity and cancer  
46 prevention: a systematic review of clinical trials. *Cancer Causes Control* 2011; 22:  
47 811–826 Available from: <http://www.ncbi.nlm.nih.gov/pubmed/21461921>  
48  
49  
50  
51  
52  
53  
54  
55  
56  
57  
58  
59  
60

Herm et al., ECG changes during a marathon race

**Table 1:** Baseline characteristics of the 107 participants of the “Berlin Beat of Running” study who finished the marathon and who had evaluable ECG data.

|                                                   |                  |
|---------------------------------------------------|------------------|
| Age; mean; years; median [IQR]                    | 48 [45-53]       |
| Female gender; % (n)                              | 24.3 (26)        |
| Body mass index; kg/m <sup>2</sup> ; median [IQR] | 23.4 [21.6-24.7] |
| Hypertension; % (n)                               | 8.4 (9)          |
| Diabetes mellitus; % (n)                          | 0 (0)            |
| Heart failure; % (n)                              | 0 (0)            |
| Coronary artery disease; % (n)                    | 0 (0)            |
| Hyperlipidemia; % (n)                             | 2.8 (3)          |
| Current smoking; % (n)                            | 6.5 (7)          |

Herm et al., ECG changes during a marathon race

**Table 2:** Cardiovascular risk profile and training status in leisure athletes with or without abnormal ECG findings, respectively. ST segment deviation, atrio- or ventricular arrhythmias (atrio-ventricular block grade IIb or III, triplets, non-sustained ventricular tachycardia, supraventricular tachycardia) or atrial fibrillation were regarded as abnormal findings.

|                                                | <b>Normal<br/>ECG<br/>n=89</b> | <b>Abnormal<br/>ECG<br/>n=18</b> | <b>p-value *</b> |
|------------------------------------------------|--------------------------------|----------------------------------|------------------|
| Age; years; median [IQR]                       | 48 [44-50]                     | 54 [48-59]                       | 0.004            |
| Female gender, % (n)                           | 24.7 (22)                      | 22.2 (4)                         | 0.822            |
| <b>Physical activity</b>                       |                                |                                  |                  |
| Marathon runs ≤ 5 years; median [IQR]          | 5 [4 -10]                      | 6 [4-7]                          | 0.923            |
| Marathon runs total; n; median [IQR]           | 9 [5-18]                       | 7 [6-14]                         | 0.573            |
| Current running; km/week; median [IQR]         | 65 [50-80]                     | 58 [50-70]                       | 0.151            |
| Regular running; km/ week; median [IQR]        | 40 [30-50]                     | 40 [30-50]                       | 0.409            |
| Present marathon time; min; median [IQR]       | 238 [215-268]                  | 275 [229-326]                    | 0.009            |
| Hematocrit post-race; %; median [IQR]          | 0.44 [0.41-0.45]               | 0.43 [0.41-0.45]                 | 0.711            |
| Body Mass Index; kg/m <sup>2</sup> ; mean ± SD | 23.2±2.2                       | 23.6±1.9                         | 0.449            |
| <b>Comorbidities</b>                           |                                |                                  |                  |
| Hypertension; % (n)                            | 6.7 (6)                        | 16.7 (3)                         | 0.166            |
| Hyperlipidaemia; % (n)                         | 2.2 (2)                        | 2.8 (3)                          | 0.438            |
| Current smoking; % (n)                         | 5.6 (5)                        | 11.1 (2)                         | 0.390            |

*Values are expressed in % (n), mean ± SD or median [IQR] as appropriate; \* p-value calculated by chi<sup>2</sup>-test or Mann-Whitney U test, as appropriate*



Herm et al., ECG changes during a marathon race

**Table 3:** Troponin elevation post-marathon in the 107 athletes who finished the marathon race and who had evaluable ECG data.

|                                                | <b>Troponin<br/>&lt; 0.050 µg/l<br/>n=89</b> | <b>Troponin<br/>≥ 0.050 µg/l<br/>n=18</b> | <b>p-value *</b> |
|------------------------------------------------|----------------------------------------------|-------------------------------------------|------------------|
| Age; years; median [IQR]                       | 48 [45-52]                                   | 49 [45-53]                                | 0.605            |
| Female gender; % (n)                           | 21.3 (19)                                    | 38.9 (7)                                  | 0.114            |
| Body mass index; kg/m <sup>2</sup> ; mean ± SD | 23 [22-25]                                   | 23 [22-25]                                | 0.723            |
| Present marathon time; min; median [IQR]       | 236 [217-269]                                | 268 [237-309]                             | 0.040            |
| Marathon runs ≤ 5 y; n; median [IQR]           | 6 [4-10]                                     | 5 [3-8]                                   | 0.327            |
| Marathon runs total; n; median [IQR]           | 9 [6-18]                                     | 7 [5-12]                                  | 0.147            |
| Regular weekly running; km; median [IQR]       | 40 [30-50]                                   | 40 [30-50]                                | 0.791            |
| Coexisting hypertension; % (n)                 | 9.0 (8)                                      | 5.6 (1)                                   | 0.632            |
| Hyperlipideamia; % (n)                         | 3.4 (3)                                      | 0 (0)                                     | 0.429            |
| ST segment deviation; % (n)                    | 3.4 (3)                                      | 27.8 (5)                                  | <0.0001          |
| Arrhythmias; % (n)                             | 11.2 (10)                                    | 5.6 (1)                                   | 0.469            |
| Troponin pre-race; µg/l; median [IQR]          | 0.012<br>[0.012-0.012]                       | 0.012<br>[0.012-0.012]                    | 0.131            |
| Creatinine pre-race; mg/dl; median [IQR]       | 0.86<br>[0.81-0.96]                          | 0.85<br>[0.77-0.97]                       | 0.761            |
| Creatinine post-race; mg/dl; median [IQR]      | 1.27<br>[1.11-1.46]                          | 1.34<br>[1.17-1.48]                       | 0.424            |
| CK post-race; U/l; median [IQR]                | 333<br>[250-412]                             | 350<br>[291-611]                          | 0.263            |
| CK-MB post-race; U/l; median [IQR]             | 35 [28-41]                                   | 33 [29-52]                                | 0.609            |

*Values are expressed in % (n), mean ± SD or median [IQR] as appropriate; \* p-value calculated by  $\chi^2$  – test or Mann-Whitney U test, as appropriate*

1  
2  
3  
4  
5  
6  
7  
8  
9  
10  
11  
12  
13  
14  
15  
16  
17  
18  
19  
20  
21  
22  
23  
24  
25  
26  
27  
28  
29  
30  
31  
32  
33  
34  
35  
36  
37  
38  
39  
40  
41  
42  
43  
44  
45  
46  
47  
48  
49  
50  
51  
52  
53  
54  
55  
56  
57  
58  
59  
60

**Figure 1:** Non-sustained ventricular tachycardia in a well-trained 48-year old male endurance runner without other cardiovascular risk factors than current smoking.

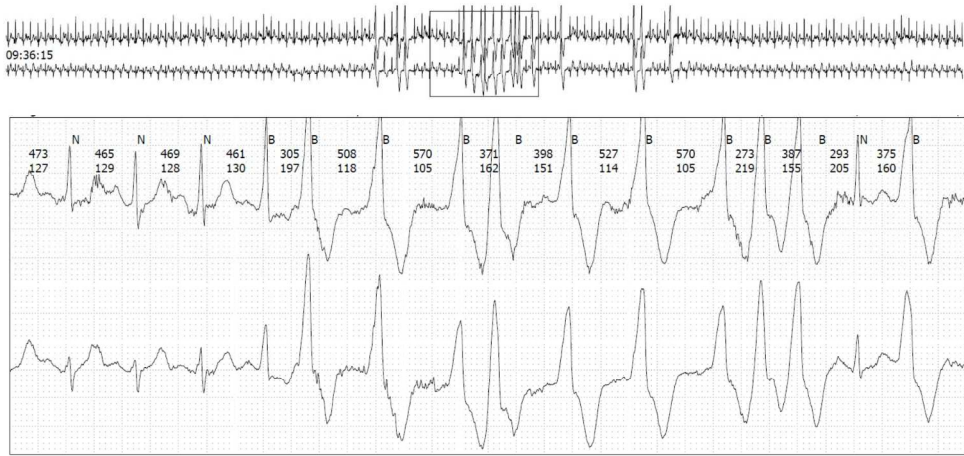

Figure 1

1260x770mm (72 x 72 DPI)

**Figure 2:** ECG at rest (A) and exercise-induced ST segment deviations (B) in a 60-year old male endurance runner without cardiovascular risk.

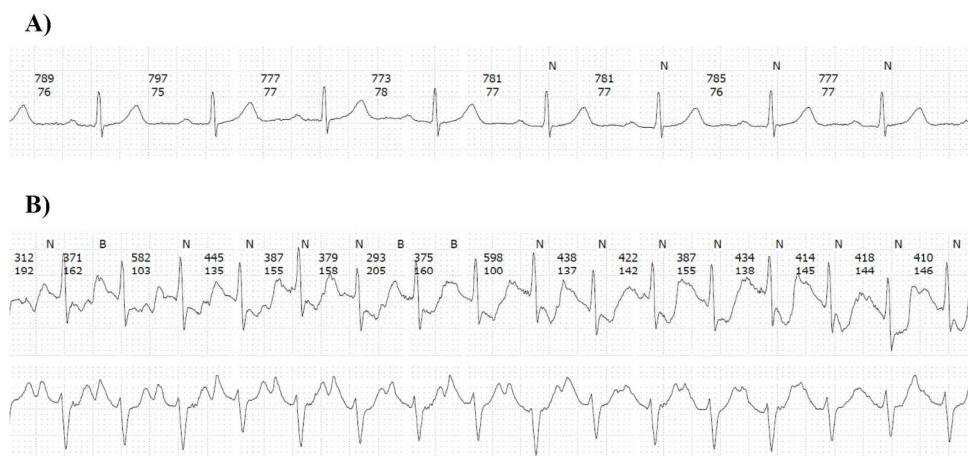

Figure 2

1257x768mm (72 x 72 DPI)

# BMJ Open

## Exercise-induced ST-segment deviations and cardiac arrhythmias in leisure endurance athletes during a marathon race: Results of the Berlin Beat of Running study

|                                 |                                                                                                                                                                                                                                                                                                                                                                                                                                                                                                                                                                                                                                                                                                                                                                                                                                                                                                                                                                                                                                                                                                                                              |
|---------------------------------|----------------------------------------------------------------------------------------------------------------------------------------------------------------------------------------------------------------------------------------------------------------------------------------------------------------------------------------------------------------------------------------------------------------------------------------------------------------------------------------------------------------------------------------------------------------------------------------------------------------------------------------------------------------------------------------------------------------------------------------------------------------------------------------------------------------------------------------------------------------------------------------------------------------------------------------------------------------------------------------------------------------------------------------------------------------------------------------------------------------------------------------------|
| Journal:                        | <i>BMJ Open</i>                                                                                                                                                                                                                                                                                                                                                                                                                                                                                                                                                                                                                                                                                                                                                                                                                                                                                                                                                                                                                                                                                                                              |
| Manuscript ID                   | bmjopen-2016-015798.R1                                                                                                                                                                                                                                                                                                                                                                                                                                                                                                                                                                                                                                                                                                                                                                                                                                                                                                                                                                                                                                                                                                                       |
| Article Type:                   | Research                                                                                                                                                                                                                                                                                                                                                                                                                                                                                                                                                                                                                                                                                                                                                                                                                                                                                                                                                                                                                                                                                                                                     |
| Date Submitted by the Author:   | 21-Apr-2017                                                                                                                                                                                                                                                                                                                                                                                                                                                                                                                                                                                                                                                                                                                                                                                                                                                                                                                                                                                                                                                                                                                                  |
| Complete List of Authors:       | Herm, Juliane; Charite Universitätsmedizin Berlin, Department of Neurology<br>Toepper, Agnieszka; , Experimental and Clinical Research Center, Berlin, Germany, Working Group on Cardiovascular Magnetic Resonance<br>Wutzler, Alexander; Charite Universitätsmedizin Berlin,<br>Kunze, Claudia; Charite Universitätsmedizin Berlin, Center for Stroke Research Berlin<br>Kruell, Matthias; SMS Medical Institute Berlin GmbH<br>Brechtel, Lars; SMS Medical Institute Berlin GmbH<br>Lock, Juergen; SMS Medical Institute Berlin GmbH<br>Fiebach, Jochen; Charite Universitätsmedizin Berlin, Center for Stroke Research Berlin (CSB)<br>Heuschmann, Peter; Julius-Maximilians-Universität Würzburg Institut für deutsche Philologie, Institute of Clinical Epidemiology and Biometry<br>Haverkamp, Wilhelm; Charité Berlin, Department of Cardiology<br>Endres, Matthias; Charité-Universitätsmedizin Berlin, Center for Stroke Research Berlin<br>Jungehulsing, Gerhard; Charite Universitätsmedizin Berlin, Center for Stroke Research Berlin (CSB)<br>Haeusler, Karl Georg; Charite Universitätsmedizin Berlin, Department of Neurology |
| <b>Primary Subject Heading</b>: | Sports and exercise medicine                                                                                                                                                                                                                                                                                                                                                                                                                                                                                                                                                                                                                                                                                                                                                                                                                                                                                                                                                                                                                                                                                                                 |
| Secondary Subject Heading:      | Cardiovascular medicine                                                                                                                                                                                                                                                                                                                                                                                                                                                                                                                                                                                                                                                                                                                                                                                                                                                                                                                                                                                                                                                                                                                      |
| Keywords:                       | marathon, ecg, Magnetic resonance imaging < RADIOLOGY & IMAGING, arrhythmia, troponin                                                                                                                                                                                                                                                                                                                                                                                                                                                                                                                                                                                                                                                                                                                                                                                                                                                                                                                                                                                                                                                        |
|                                 |                                                                                                                                                                                                                                                                                                                                                                                                                                                                                                                                                                                                                                                                                                                                                                                                                                                                                                                                                                                                                                                                                                                                              |

SCHOLARONE™  
Manuscripts

1  
2  
3 **Exercise-induced ST-segment deviations and cardiac arrhythmias in leisure endurance**  
4 **athletes during a marathon race: Results of the Berlin Beat of Running study**  
5

6  
7 Juliane Herm, MD<sup>1,2</sup>, Agnieszka Töpper, MD<sup>3-5</sup>, Alexander Wutzler, MD<sup>5</sup>, Claudia Kunze<sup>2</sup>,  
8  
9 Matthias Krüll, MD<sup>6,7,8</sup>, Lars Brechtel, MD<sup>6,7,8</sup>, Jürgen Lock, MD<sup>6,7,8</sup>, Jochen B. Fiebach,  
10  
11 MD<sup>2</sup>, Peter U. Heuschmann, MD<sup>9,10</sup>, Wilhelm Haverkamp, MD<sup>5</sup>, Matthias Endres,  
12  
13 MD<sup>1,2,11,12,13</sup>, Gerhard Jan Jungehulsing, MD<sup>2,14\*</sup>, Karl Georg Haeusler, MD, FESC<sup>1,2\*</sup>  
14  
15

16 <sup>1</sup>Department of Neurology, Charité - Universitätsmedizin Berlin, Germany; <sup>2</sup>Center for Stroke  
17  
18 Research Berlin, Charité – Universitätsmedizin Berlin, Germany; <sup>3</sup>Working Group on  
19  
20 Cardiovascular Magnetic Resonance, Experimental and Clinical Research Center, Berlin,  
21  
22 Germany; <sup>4</sup>HELIOS Klinikum Berlin Buch, Department of Cardiology and Nephrology,  
23  
24 Germany; <sup>5</sup>Department of Cardiology, Campus Virchow-Klinikum, Charité-  
25  
26 Universitätsmedizin Berlin, Berlin, Germany; <sup>6</sup>SMS Medical Institute Berlin GmbH,  
27  
28 Germany; <sup>7</sup>SCC EVENTS GmbH Berlin, Germany; <sup>8</sup>Berlin Academy of Sports Medicine,  
29  
30 Germany; <sup>9</sup>Institute of Clinical Epidemiology and Biometry, University of Würzburg,  
31  
32 Germany; <sup>10</sup>Clinical Trial Center Würzburg, University Hospital Würzburg, Germany;  
33  
34 Germany; <sup>11</sup>German Center for Neurodegenerative Diseases (DZNE), Partner Site Berlin, Germany;  
35  
36 <sup>12</sup>German Center for Cardiovascular Diseases (DZHK), Partner Site Berlin, Germany; <sup>13</sup>  
37  
38 Berlin Institute of Health, Germany; <sup>14</sup>Department of Neurology, Jüdisches Krankenhaus  
39  
40 Berlin, Germany  
41  
42  
43

44  
45 \* Authors contributed equally

46  
47 Short title: ECG changes during a marathon race

48  
49 Corresponding author: Juliane Herm, MD

50  
51 Charité - Universitätsmedizin Berlin, Campus Benjamin  
52  
53 Franklin, Hindenburgdamm 30, 12203 Berlin, Germany  
54

55  
56 Phone +49-30-450560663 FAX +49-30-450560979  
57

58  
59 juliane.herm@charite.de  
60

Herm et al., ECG changes during a marathon race

## Abstract

*Introduction* The “Berlin Beat of Running” study focused on ECG-monitoring during strenuous exercise. *Methods and Results* Experienced marathon runners wore a portable electrocardiogram (ECG) recorder during a marathon race, and underwent blood tests 2-3 days prior, directly after and 1-2 days afterwards. Overall, 108 athletes (median 48 years (IQR 45-53), 24% female) completed the marathon in 249±43 min. Blinded ECG-analysis revealed abnormal findings during the marathon in 18 (16.8%) athletes. Ten (9.3%) athletes had at least one episode of non-sustained ventricular tachycardia, one of whom had atrial fibrillation; eight (7.5%) individuals showed transient ST-segment deviations. Abnormal ECG-findings were associated with advanced age (OR 1.11 per year [95%CI 1.01-1.23]); sex and cardiovascular risk profile had no impact. Directly after the race, high-sensitive troponin T was elevated in 18 (16.7%) athletes and associated with ST-segment deviation (OR 9.9 [95%CI 1.9-51.5], while age, sex and cardiovascular risk profile had no impact.

*Conclusion* ECG-monitoring during a marathon is feasible. Abnormal ECG-findings were present in every sixth athlete. Exercise-induced transient ST-segment deviations were associated with elevated hsTnT values.

*Trial registration:* clinicaltrials.gov NCT01428778.

*Keywords:* Marathon – ECG – magnetic resonance imaging – arrhythmia – troponin

## Strengths and limitations

- This is the so far largest study demonstrating feasibility of non-invasive ECG recording during a marathon race.

Herm et al., ECG changes during a marathon race

- More than one hundred experienced marathon runners underwent blood sampling within 2-3 days prior, directly after and 1-2 days after the race.
- Cardiac MRI was performed in a subset of athletes with abnormal ECG findings and/or elevated troponin T values.
- Serial echocardiography and a standardized exercise capacity testing would have allowed for a more encompassing interpretation of the results.

## Introduction

Regular physical exercise has many health benefits: Improving blood pressure control, insulin sensitivity and lipid profiles, it reduces overall mortality and disability [1] and the number of cardiovascular events [2,3]. Moreover, regular physical exercise also reduces the risk of certain cancers [4] and the number of mood disorders [5]. However, highly strenuous physical exercise may have a negative impact on cardiovascular health [6]. While marathon running has become a popular sport, cardiac arrest is rare but occurs in about 1:100,000 marathon runners, most commonly in those with hypertrophic cardiomyopathy or atherosclerotic coronary disease [7]. Available data on incidence of myocardial infarction after running a marathon is limited to case reports [8] and the prospective *RACE* Paris Registry [9], but elevated levels of troponin – a sensitive biomarker of cardiac injury – were reported in a relevant subset of asymptomatic marathon runners [10–12]. Other potentially harmful effects of strenuous exercise, like right ventricular dysplasia and ventricular arrhythmia, have also been reported for triathletes and other ultra-endurance athletes [13–15]. Moreover, a meta-analysis of mostly retrospective and small case-control series as well as a recent cohort study

Herm et al., ECG changes during a marathon race

indicated that intense endurance sport increases the long-term risk of atrial fibrillation [16,17]. The EHRA consortium has recently updated its recommendations regarding abnormal ventricular arrhythmias in endurance athletes and stated that a non-sustained ventricular tachycardia (nsVT) requires diagnostic evaluation for latent hypertrophic cardiomyopathy or ischemic heart disease, especially if these occur under physical exercise [18]. However, there are very few publications regarding cardiac arrhythmias occurring during endurance sport so far [19–22].

Herewith, we report the results of the “Berlin Beat of Running” study [23], demonstrating feasibility of continuous ECG-monitoring in 108 leisure endurance athletes during a marathon race. We focus on the frequency of cardiac arrhythmias and ST-segment deviations.

## **Methods**

### ***Study design***

The “Berlin Beat of Running” study is a prospective, observational, investigator-initiated study. The study design has been published in detail [23]. In short, all pre-registered participants were informed by the organizers of the marathon about the study, and they contacted the study personnel if they were interested. Participants aged 35-60 years with at least 2 marathon runs within the last 5 years and an average training of 40 km running per week were enrolled after giving written informed consent. Exclusion criteria included known cardiac disease or arrhythmia, prior stroke, tumor or infectious disease, severe liver or kidney disease, hyperthyroidism, pregnancy or lactation. Continuous ECG recording (using the CardioMem® CM 4000 provided by GETEMED AG, Teltow, Germany) was started in 109



Herm et al., ECG changes during a marathon race

study patients at up to 74 hours before the 38<sup>th</sup> BMW BERLIN MARATHON and continued throughout the entire race and for up to 58 hours afterwards. Laboratory assessment including hsTnT measurement with chemiluminescence immunoassays (Roche Diagnostics, Mannheim, Germany; cut-off 12 µg/L) was performed at up to 74 hours before, within 30 minutes post-race, and for up to 58 hours after the race. The study protocol is in accordance with the Helsinki declaration and was approved by the Ethics Committee of the Charité - Universitätsmedizin Berlin (EA4/042/11). The primary hypothesis was: Cardiac arrhythmias and especially AF is frequently found in experienced marathon runners. Therefore, the primary outcome is the number of marathon runners with newly diagnosed cardiac arrhythmias. The main secondary hypotheses were: (1) There are predictable risk factors associated with cardiac arrhythmias in marathon runners; (2) Pathological laboratory findings are (in part) associated with cardiac arrhythmias; (3) Marathon runners with elevated troponin levels do not have MRI-detected myocardial scars suggestive for myocardial infarction. Follow-up information on past medical history was assessed one year after the marathon.

### ***MRI analysis***

A cardiac MRI after the race was offered to all study participants with either ST-segment deviation or hsTnT elevation. 3T MRI (Magnetom Tim Trio; Siemens AG, Erlangen, Germany) was performed using a phased array receiver coil during breath-holds gated to the electrocardiogram (Body Matrix-coil #TATS; Siemens AG). Cine images of 3 long-axis and 14-18 short-axis views (slices of 4 mm) were created using a steady state free precession technique [24]. Eight minutes after i.v. administration of 10-12 ml Gadovist<sup>®</sup> (Bayer Schering

1  
2  
3  
4  
5  
6  
7 Herm et al., ECG changes during a marathon race  
8  
9

10  
11 Pharma AG, Berlin, Germany) at a concentration of 1 mmol/ml, these views were repeated  
12  
13 using a short inversion recovery sequence and continuously adjusting the inversion time [25].  
14

### 15 16 17 18 ***ECG analysis*** 19

20 ECG monitoring was performed using the two-channel portable ECG recorder (CardioMem<sup>®</sup>  
21 CM 4000; GETEMED AG, Teltow, Germany). The cardiologists (AT, AW, WH), who  
22 analyzed the ECG data, were blinded for demographic, clinical or laboratory data. The five  
23 recorded leads were placed as follows in order to obtain two independent bipolar channels:  
24 left (1) and right (2) on the first intercostal space, right on the sixth intercostal space  
25 parasternal (3) and mid-clavicular line (4), left ninth intercostal space mid-clavicular line (5).  
26  
27 As there are no published recommendations on interpretation of a Holter-ECG in athletes, we  
28 took into consideration recommendations available for interpreting a 12-lead ECG in athletes  
29 [26] as well as recent EHRA guidelines on ventricular arrhythmias [18]. In line with this, we  
30 defined an abnormal ECG as presence of ST-segment deviation under physical exercise or  
31 arrhythmias. Low-pass-filtering was set at 0.05 Hz in order to detect changes in the ST-T-  
32 segment. The ST-segment was considered abnormal in the virtually artifact free 2-lead ECG if  
33 horizontal or down-sloping  $\geq 1$  mm occurred over the 60 ms after the J-junction (80 ms if the  
34 heart rate was  $<120$  beats/min) [27]. ST-segments were analyzed in relation to the TP  
35 segment. Segments were analyzed after recording of stable isoelectric TP segments in three  
36 consecutive beats. If single QRS complexes showed notching, slurring or fragmentation, QRS  
37 and ST intervals were excluded from further analysis. Episodes lasting more than 30 seconds  
38 preceded and followed by regular ECG recording were also considered abnormal. Drezner et  
39  
40  
41  
42  
43  
44  
45  
46  
47  
48  
49  
50  
51  
52  
53  
54  
55  
56  
57  
58  
59  
60

Herm et al., ECG changes during a marathon race

al. defined atrial arrhythmias as atrio-ventricular (AV) block grade IIb or III, atrial fibrillation or supraventricular tachycardia (SVT) [26]. Ventricular arrhythmias were defined as nsVT of at least three premature ventricular complexes (PVC) and a heart rate of  $\geq 100$  beats per minute [18,26].

### ***Statistical analysis***

In accordance with the sample size calculation, we planned to include 110 participants into the study [23]. For categorical data, absolute and relative frequencies were calculated using SPSS statistics 22. In the case of continuous variables with nearly normal distribution, we used the arithmetic mean, standard deviation, minimal and maximal values, otherwise median, quartiles, minimal and maximal values. The *Chi* quadrat test was used to compare proportions for dichotomous outcomes between independent groups or to test independency of two dichotomous variables within a population. Outcomes in an ordinal scale or continuous outcomes were analyzed using the t-test or the Mann-Whitney test, depending on normality or non-normality of distribution. A p value of  $<0.05$  was considered to be statistically significant. In multivariate analysis, potential impact factors identified on a  $p < 0.05$  level in univariate analysis were entered in a binary logistic regression model using backwards selection.

Herm et al., ECG changes during a marathon race

## Results

### *Baseline data of study participants and feasibility of ECG recording*

Overall, 109 (99.1%) of 110 study participants took part, and 108 (98.2%) participants finished the 38<sup>th</sup> BMW BERLIN MARATHON 2011 in an average running time of 249±43 min. September 25, 2011, was a sunny day in Berlin and temperatures reached a maximum of 22 degrees Celsius. Data quality of long-term Holter-ECG was sufficient to ensure assessment of arrhythmias and ST-segment deviations in 107 (98.2%) athletes, although motion and perspiration artifacts were present in the majority of athletes. In one athlete, a technical error occurred. Consistently wearing the ECG recorder on the upper arm using a carrier bag, no athlete reported problems in this regard. No athlete stopped wearing the ECG device prematurely. Baseline characteristics of those 107 participants are depicted in **Table 1**. The median age of these 107 participants was 48 years; 23.9% were female. The cardiovascular risk profile was low. The participants had attended a median of 5 marathon races within the last 5 years and a median of 8 marathon races in total. Their average weekly running distance prior to the race was 40 km (IQR 30-50 km). In addition, athletes regularly went cycling (44.9%; n=48); or swimming (18.7%; n=20), respectively.

### *Cardiac arrhythmias or ST-segment deviation during the marathon*

During the race, mean heart rate was in 156.7±9.4 beats per minute. Minimum and maximum median heart rate were 133 (IQR 120-142) and 172 (IQR 166-177) beats per minute, respectively. We observed nsVT in 10 (9.4%) athletes (**Figure 1**), 2 (20%) of those athletes

Herm et al., ECG changes during a marathon race

were female. In athletes with nsVTs the median number of beats was 3 (IQR 3-5; range 3-9), median rate was 166 beats per minute (IQR 149-188; range 133-224) and median duration of the recorded nsVT was 1121 ms (IQR 919-1841; range 901-4400). We did not observe an AV block or a SVT. Persistent atrial fibrillation was found in one male patient (0.9%). Filtering of the monitors allowed interpretation of ST-T wave changes in fashion similar to a standard ECG. Exercise-induced ST-segment deviations occurred in eight (7.5%) study participants during the marathon race (**Figure 2**), 2 (25%) of those athletes were female. Characteristics of all athletes with ST-segment deviation are displayed in the *online supplement*. Intensity of ST-segment deviation in terms of ST-level was -0.7mV (IQR -0.8 to -0.3; range -0.9 to -0.16). ECG monitoring was prolonged for up to 54 hours (median 28 hours) after the marathon race. ST-segment deviations were not found in any athlete with ST-segment deviation during the marathon. One of those eight athletes also had nsVT. While four (3.7%) athletes reported palpitations during the marathon race, one of them had AF, one had a single nsVT (lasting nine beats) and another athlete had multiple supraventricular premature beats (62/hour). No athlete reported cardiac pain or dyspnea. An abnormal ECG according to pre-defined criteria was found in 16.8% (n=18) of all participants. In univariate analysis, advanced age (p=0.004) and a longer marathon finishing time (p=0.009) were associated with abnormal ECG findings, while sex, cardiovascular risk profile, hematocrit post-race and the number of previous marathons were not. In multivariate analysis, advanced age remained significant (OR 1.11 per year [95%CI 1.01-1.23]) (**Table 2**). In addition, athletes with an abnormal ECG had a higher frequency of PVCs (median 3.0 (IQR 1.0-12.3) versus 23.5 (IQR 10.0-44.0), p<0.001) during the marathon race.

Herm et al., ECG changes during a marathon race

### ***Cardiac biomarkers and ECG changes during the marathon***

At baseline, hsTnT was normal in all marathon runners (<50 ng/L). Within minutes after the race had finished, hsTnT was elevated above 50 ng/L in 18 (16.8%) of participants and median hsTnT was 3 ng/L (IQR 2-4; range 1-22). Median hsTnT values in 18 athletes with elevated hsTnT was 68.5 ng/L (IQR 62.8-85.5, range 50-216). Characteristics of all athletes with elevated hsTnT are displayed in the *online supplement*. In all athletes, median creatinine kinase (CK) and CK-MB were 130 U/l (IQR 103–176) and 20 U/l (IQR 17–24) pre-marathon, respectively. Post-marathon CK was 336 (IQR 252-417) U/l and CK-MB was 35 (IQR 29-41) U/l.

Comparing athletes with an elevated hsTnT post-marathon to those without, we found no difference in age, sex, cardiovascular risk factors, training level or post-marathon CK-MB values (**Table 3**). In runners with elevated hsTnT, we found more frequent ST-segment deviations ( $p < 0.0001$ ) but no association with cardiac arrhythmias. In addition, elevated hsTnT was found in individuals with a longer marathon finishing time ( $p = 0.040$ ). Athletes with elevated hsTnT had a lower hematocrit compared to athletes without hsTnT elevation ( $p = 0.003$ ). In multivariate analysis, ST-segment deviation (OR 9.9 [95%CI 1.9-51.5]) as well as hematocrit (OR 0.76 per percent [95%CI 0.62-0.92]) remained statistically significant. Within 48 hours post-marathon, hsTnT was within normal range in 106 (99.1%) athletes; one athlete with no substantial ECG alterations during the marathon showed a persisting hsTnT elevation but normal 12-lead ECG post-marathon. Follow-up information was available in all

Herm et al., ECG changes during a marathon race

eight athletes with ST-segment deviation and in eight out of ten patients with nsVT during the race. None of the athletes reported a cardiovascular event within one year after the race.

### ***Cardiac MRI in athletes with ST-segment deviation or elevated hsTnT***

Cardiac MRI was offered to all study participants with ST-segment deviation or hsTnT elevation. Five out of eight athletes with ST-segment deviation and hsTnT elevation as well as in five out of 18 athletes with hsTnT elevation but without ST-segment deviation underwent MRI within 10-42 days after the marathon race. Age, gender and cardiovascular risk factors did not differ in those 10 athletes undergoing cardiac MRI and those 14 athletes who did not undergo cardiac MRI. Cardiac MRI revealed no pathological findings for cardiac function and there was no late gadolinium enhancement, indicating myocardial fibrosis. Additional cardiac work-up was strongly recommended in all patients with pathological ECG-findings.

### **Discussion**

This is the so far largest study demonstrating feasibility of ECG recording during a marathon race, which may help counseling a subset of endurance athletes regarding exercise-associated complications. One main finding of the “Berlin Beat of Running” study is the unexpectedly high rate of abnormal ECG findings in 17% of leisure endurance athletes. Moreover, this is the first study reporting an association of transient ST-segment abnormalities during a

Herm et al., ECG changes during a marathon race

marathon with elevated hsTnT levels after finishing the race. However, we cannot be sure that the observed ST-segment deviations are definitively based on silent ischemia.

So far, there is limited data on ECG abnormalities during vigorous exercise [28]. Franco et al. reported “no arrhythmias” in 19 male athletes during a marathon [21], while Aagaard et al. found “no ventricular arrhythmias” but atrial fibrillation in two (4%) of 49 male endurance runners during a 30 km race [22]. Luurila et al. reported the presence of ventricular premature complexes in 33 (89%) of 37 recreational athletes during a ski marathon as well as ST-segment deviations in 3 (8%) of these middle-aged men [20]. Most recently, Grabs et al. used a 1-lead wireless ECG and reported premature atrial contractions but no arrhythmias in 20 male runners during a marathon race [19]. In our prospective study, 10 (9.4%) out of 107 leisure endurance athletes had a non-sustained ventricular arrhythmia during the marathon and one (0.9%) athlete had AF. In addition, ST-segment deviations (**Figure 2**) were detected in 8 (7.5%) athletes. Advanced age was associated with abnormal ECG findings (**Table 2**). According to the hematocrit, low hydration— potentially impacting on cardiac preload – was not linked to abnormal ECG findings.

Despite the fact that increased levels of physical activity were associated with a lower relative risk of myocardial infarction, 4% of patients with myocardial infarction report having performed strenuous exercise within hours before the cardiovascular event [3]. By using different cut-offs, transient elevations in the level of troponin T or troponin I has previously been reported in 18-69% of marathon runners [10–12,29]. In the “Berlin Beat of Running” cohort, hsTnT was elevated in 18 (17%) out of 107 athletes but normalized within 48 hours in 17 (94%) of those. Interestingly, elevation of hsTnT was not related to age, sex, training



Herm et al., ECG changes during a marathon race

status, the cardiovascular risk profile or the presence of cardiac arrhythmias during the race, but was related to exercise-induced ST-segment deviation ( $p < 0.0001$ ) and inversely correlated with the hematocrit (measured immediately after the race).

Cardiac magnetic resonance imaging (MRI) is now the gold standard for detecting myocardial damage [30] and myocardial edema as well as decreased ventricular function after a marathon race [31,32]. We were not able to demonstrate late gadolinium enhancement as an indicator of permanent myocardial fibrosis in ten experienced but leisure athletes with ST-segment deviation or detected cardiac arrhythmia. This is in line with a previous study reporting no late gadolinium enhancement in 20 leisure athletes within 48 hours after a marathon race [31]. Interestingly, a transient cardiac edema was reported in 17 (85%) out of 20 marathon runners [31], but no correlation was reported between biomarkers and cardiac edema. We, however, are unable to exclude a transient cardiac edema in marathon runners, because cardiac MRI was performed within 10-42 days after the marathon race.

Taken together, vigorous exercise can go along with transient troponin elevation, ST-segment alterations or nsVT in a fit and active population. However, athletes with ST-segment deviation or nsVT during the race did not report a cardiovascular event within one year afterwards. Thus, these findings are likely to be benign, but structural heart disease or obstructive coronary artery disease was recommended to be ruled out in these athletes. Our results strengthen the assumption that hsTnT elevation originates from the heart and not primarily from non-cardiac sources [8]. However, we are unable to draw final conclusions. Whether borderline cardiac damage by repetitive strenuous exercise could lead to permanent (potentially arrhythmogenic) cardiac remodeling is under debate [6,33].

Herm et al., ECG changes during a marathon race

Major limitations of the observational “Berlin Beat of Running” study, as it focused primary on the feasibility of portable ECG monitoring and detection of ECG changes during the race, are the missing (serial) echocardiography or cardiac stress MRI, limiting the clinical significance of the observed ST-segment changes and elevated hsTnT levels. Furthermore, a normal cardiac MRI within days after the race does not completely rule out (transient) exercise-induced cardiac damage [34]. Since only one fourth of all athletes were and because of a potential selection bias during enrolment, the generalizability of our results is limited. Moreover, due to the limited number of endpoints observed, we believe that the results of the multivariate analysis should be interpreted with caution. Combining nsVT and ST-segment deviations for statistical analysis may have introduced an information bias. Finally, exercise capacity testing would have allowed more accurate evaluation of training status.

## Conclusion

ECG recording during a marathon race is feasible, which may be helpful in the diagnostic work-up of selected athletes. Cardiac arrhythmias or exercise-induced ST-segment deviations appear in a relevant subset of experienced leisure athletes during a marathon race and predominantly in older athletes. Marathon-induced ST-segment deviations were associated with elevated hsTnT values immediately after the race. Cardiac MRI detected no myocardial fibrosis by late gadolinium enhancement in a subset of these athletes.

Herm et al., ECG changes during a marathon race

### List of abbreviations

atrial fibrillation, AF; AV, atrio-ventricular; CK, creatine kinase; CK-MB, myocardium- and brain-specific CK; electrocardiogram, ECG; hsTnT, high-sensitive troponin T; magnetic resonance imaging, MRI; SVT, supraventricular tachycardia; Tesla, T; non-sustainable ventricular tachycardia, nsVT.

### Funding

The investigator-initiated “Berlin Beat of Running” study was supported by the SCC EVENTS GmbH, Berlin. Bayer Healthcare (Leverkusen, Germany) and Sanofi-Aventis Deutschland GmbH (Berlin, Germany) supported the study with an unrestricted grant. The GETEMED AG (Teltow, Germany) provided the ECG-recorders and comprehensive technical support. KGH, JH, CK, JBF, ME and GJJ received funding from the Federal Ministry of Education and Research via the grant Center for Stroke Research Berlin (01 EO 0801). ME received support from the Volkswagen-Stiftung, Deutsche Forschungsgemeinschaft and the EU.

### Acknowledgement

The results of the present study are presented clearly, honestly, and without fabrication, falsification, or inappropriate data manipulation, and statement that results of the present study do not constitute endorsement by ACSM. We appreciate the work of the organizing SCC EVENTS GmbH who supported the “Berlin Beat of Running” study in an outstanding manner. We would like to thank all members of the “Berlin Beat of Running” study team [23]

1  
2  
3  
4  
5  
6  
7 Herm et al., ECG changes during a marathon race  
8  
9

10  
11 and all athletes for their participation. In addition, we thank Catherine Aubel (CSB) and Julia  
12  
13 Herde (CSB) for critically reviewing the manuscript.  
14  
15

### 16 17 18 **Competing interests**

19  
20 JH reports no conflict of interest. AT reports lecture fees from the Circle Institute. MK  
21  
22 received consulting, lecture and advisory board fees from ALK, Berlin Chemie, Novartis,  
23  
24 Mundipharma and Teva. LB reports research support from German Ministry of Research and  
25  
26 Education. JBF reports the following board memberships, consultancies and/or payments for  
27  
28 lectures including service on speaker's bureaus: Boehringer-Ingelheim, Lundbeck, BioClinica  
29  
30 and Parexel. PUH reports research grants from the German Ministry of Research and  
31  
32 Education, EU, Charité, Berlin Chamber of Physicians, German Parkinson Society,  
33  
34 University Hospital Würzburg, Robert-Koch-Institute, Charité–Universitätsmedizin Berlin  
35  
36 (within MonDAFIS; MonDAFIS is supported by an unrestricted research grant to the Charité  
37  
38 from Bayer Healthcare), University Göttingen (within FIND-AF<sub>randomized</sub>; FIND-AF<sub>randomized</sub> is  
39  
40 supported by an unrestricted research grant to the University Göttingen from Boehringer-  
41  
42 Ingelheim), and University Hospital Heidelberg (within RASUNOA-prime; RASUNOA-  
43  
44 prime is supported by an unrestricted research grant to the University Hospital Heidelberg  
45  
46 from Bayer Healthcare, BMS, Boehringer-Ingelheim), outside submitted work. GJJ has  
47  
48 received funding from the German Ministry for Education and Research. He has served on the  
49  
50 Critical Event committees of the SourceXT registry and the ProTAVI-C-study (Edwards  
51  
52 Lifesciences, USA). He serves as a consultant for Cipio Partners (Munich, Germany and  
53  
54 Elron, Tel Aviv, Israel). He has received speakers honoraria from Genzyme and Pfizer (2010-  
55  
56  
57  
58  
59  
60

1  
2  
3  
4  
5  
6  
7 Herm et al., ECG changes during a marathon race  
8  
9

10  
11 2013). ME and KGH report lecture fees and study grants from Sanofi-Aventis and Bayer  
12  
13 Healthcare.  
14

### 15 16 17 18 **Contributorship statement**

19  
20 JH has made substantial contributions to acquisition, analysis and interpretation of data and  
21  
22 drafted the manuscript. AT and AW have made substantial contributions to data analysis and  
23  
24 interpretation of data. CK has made substantial contributions to design and acquisition of  
25  
26 data. MK, LB, JL, JBF, WH and ME revised the manuscript critically for important  
27  
28 intellectual content. PUH has made substantial contributions to analysis and interpretation of  
29  
30 data and revised the manuscript critically for important intellectual content. GJJ has made  
31  
32 substantial contributions to conception and design and revised the manuscript critically for  
33  
34 important intellectual content. KGH has made substantial contributions to conception and  
35  
36 design, analysis and interpretation of data and drafted the manuscript.  
37  
38  
39  
40  
41

### 42 **Data Sharing Statement**

43  
44 There are no additional data available for this study.  
45  
46  
47  
48  
49  
50  
51  
52  
53  
54  
55  
56  
57  
58  
59  
60

Herm et al., ECG changes during a marathon race

## References

- 1 Chakravarty EF, Hubert HB, Lingala VB, *et al.* Reduced disability and mortality among aging runners: a 21-year longitudinal study. *Arch Intern Med* 2008;**168**:1638–46. doi:10.1001/archinte.168.15.1638
- 2 Soares-Miranda L, Siscovick DS, Psaty BM, *et al.* Physical Activity and Risk of Coronary Heart Disease and Stroke in Older Adults. *Circulation* 2016;**133**:147–55. doi:10.1161/CIRCULATIONAHA.115.018323
- 3 Mittleman MA, Maclure M, Tofler GH, *et al.* Triggering of acute myocardial infarction by heavy physical exertion. Protection against triggering by regular exertion. Determinants of Myocardial Infarction Onset Study Investigators. *N Engl J Med* 1993;**329**:1677–83. doi:10.1056/NEJM199312023292301
- 4 Winzer BM, Whiteman DC, Reeves MM, *et al.* Physical activity and cancer prevention: a systematic review of clinical trials. *Cancer Causes Control* 2011;**22**:811–26. doi:10.1007/s10552-011-9761-4
- 5 Carek PJ, Laibstain SE, Carek SM. Exercise for the treatment of depression and anxiety. *Int J Psychiatry Med* 2011;**41**:15–28. <http://www.ncbi.nlm.nih.gov/pubmed/21495519> (accessed 23 Nov 2011).
- 6 La\_Gerche A, Heidbuchel H. Can intensive exercise harm the heart? You can get too much of a good thing. *Circulation* 2014;**130**:992–1002. doi:10.1161/CIRCULATIONAHA.114.008141

Herm et al., ECG changes during a marathon race

- 1  
2  
3  
4  
5  
6  
7  
8  
9  
10  
11 7 Kim JH, Malhotra R, Chiampas G, *et al.* Cardiac arrest during long-distance running  
12 races. *N Engl J Med* 2012;**366**:130–40. doi:10.1056/NEJMoa1106468  
13  
14  
15  
16 8 Albano AJ, Thompson PD, Kapur NK. Acute coronary thrombosis in Boston marathon  
17 runners. *N Engl J Med* 2012;**366**:184–5. doi:10.1056/NEJMc1111015  
18  
19  
20  
21 9 Gerardin B, Collet J-P, Mustafic H, *et al.* Registry on acute cardiovascular events  
22 during endurance running races: the prospective RACE Paris registry. *Eur Hear J*  
23 2016;**37**:2531–41. doi:10.1093/eurheartj/ehv675  
24  
25  
26  
27  
28  
29 10 Eijsvogels TMH, Hoogerwerf MD, Maessen MFH, *et al.* Predictors of cardiac troponin  
30 release after a marathon. *J Sci Med Sport* 2014;**18**:88–92.  
31  
32  
33  
34  
35  
36  
37 11 Mehta R, Gaze D, Mohan S, *et al.* Post-exercise cardiac troponin release is related to  
38 exercise training history. *Int J Sport Med* 2012;**33**:333–7. doi:10.1055/s-0031-1301322  
39  
40  
41  
42 12 Fortescue EB, Shin AY, Greenes DS, *et al.* Cardiac troponin increases among runners  
43 in the Boston Marathon. *Ann Emerg Med* 2007;**49**:137–43, 143.e1.  
44  
45  
46  
47  
48  
49  
50 13 O’Keefe JH, Patil HR, Lavie CJ, *et al.* Potential adverse cardiovascular effects from  
51 excessive endurance exercise. *Mayo Clin Proc* 2012;**87**:587–95.  
52  
53  
54  
55  
56  
57 14 Heidbüchel H, Hoogsteen J, Fagard R, *et al.* High prevalence of right ventricular  
58 involvement in endurance athletes with ventricular arrhythmias. Role of an  
59  
60

Herm et al., ECG changes during a marathon race

- electrophysiologic study in risk stratification. *Eur Hear J* 2003;**24**:1473–80. <http://www.ncbi.nlm.nih.gov/pubmed/12919770> (accessed 5 Aug 2014).
- 15 Harper RW, Mottram PM. Exercise-induced right ventricular  
16 dysplasia/cardiomyopathy--an emerging condition distinct from arrhythmogenic right  
17 ventricular dysplasia/cardiomyopathy. *Hear Lung Circ* 2009;**18**:233–5.  
18  
19 doi:10.1016/j.hlc.2008.01.005  
20  
21  
22  
23  
24  
25  
26 16 Abdulla J, Nielsen JR. Is the risk of atrial fibrillation higher in athletes than in the  
27 general population? A systematic review and meta-analysis. *Europace* 2009;**11**:1156–  
28  
29 9. doi:10.1093/europace/eup197  
30  
31  
32  
33  
34 17 Andersen K, Farahmand B, Ahlbom A, *et al.* Risk of arrhythmias in 52 755 long-  
35 distance cross-country skiers: a cohort study. *Eur Hear J* 2013;**34**:3624–31.  
36  
37 doi:10.1093/eurheartj/eh188  
38  
39  
40  
41 18 Pedersen CT, Kay GN, Kalman J, *et al.* EHRA/HRS/APHRS expert consensus on  
42 ventricular arrhythmias. *Europace* 2014;**16**:1257–83. doi:10.1093/europace/euu194  
43  
44  
45  
46 19 Grabs V, Peres T, Zelger O, *et al.* Decreased prevalence of cardiac arrhythmias during  
47 and after vigorous and prolonged exercise in healthy male marathon runners. *Am Hear*  
48  
49 *J* 2015;**170**:149–55. doi:10.1016/j.ahj.2015.04.001  
50  
51  
52  
53  
54 20 Luurila OJ, Karjalainen J, Viitasalo M, *et al.* Arrhythmias and ST segment deviation  
55 during prolonged exhaustive exercise (ski marathon) in healthy middle-aged men. *Eur*  
56  
57 *Hear J* 1994;**15**:507–13. <http://www.ncbi.nlm.nih.gov/pubmed/8070478> (accessed 23  
58  
59  
60



Herm et al., ECG changes during a marathon race

Nov 2011).

- 21 Franco V, Callaway C, Salcido D, *et al.* Characterization of electrocardiogram changes throughout a marathon. *Eur J Appl Physiol* 2014;**114**:1725–35. doi:10.1007/s00421-014-2898-6
- 22 Aagaard P, Sahlén A, Bergfeldt L, *et al.* Heart rate and its variability in response to running-associations with troponin. *Med Sci Sport Exerc* 2014;**46**:1624–30. doi:10.1249/MSS.0000000000000270
- 23 Haeusler KG, Herm J, Kunze C, *et al.* Rate of cardiac arrhythmias and silent brain lesions in experienced marathon runners: rationale, design and baseline data of the Berlin Beat of Running study. *BMC Cardiovasc Disord* 2012;**12**:69. doi:10.1186/1471-2261-12-69
- 24 Carr JC, Simonetti O, Bundy J, *et al.* Cine MR angiography of the heart with segmented true fast imaging with steady-state precession. *Radiology* 2001;**219**:828–34. <http://www.ncbi.nlm.nih.gov/pubmed/11376278> (accessed 23 Nov 2011).
- 25 Simonetti OP, Kim RJ, Fieno DS, *et al.* An improved MR imaging technique for the visualization of myocardial infarction. *Radiology* 2001;**218**:215–23. <http://www.ncbi.nlm.nih.gov/pubmed/11152805> (accessed 23 Oct 2011).
- 26 Drezner JA, Ackerman MJ, Anderson J, *et al.* Electrocardiographic interpretation in athletes: the ‘Seattle criteria’. *Br J Sport Med* 2013;**47**:122–4. doi:10.1136/bjsports-2012-092067

1  
2  
3  
4  
5  
6  
7 Herm et al., ECG changes during a marathon race  
8  
9

- 10  
11 27 Gramatikov B, Iyer V. Intra-QRS spectral changes accompany ST segment changes  
12 during episodes of myocardial ischemia. *J electrocardiol* 2015;**48**:115–22.  
13 doi:10.1016/j.jelectrocard.2014.09.005  
14  
15  
16  
17  
18 28 Spethmann S, Prescher S, Dreger H, *et al.* Electrocardiographic monitoring during  
19 marathon running: a proof of feasibility for a new telemedical approach. *Eur J Prev*  
20 *Cardiol* 2014;**21**:32–7. doi:10.1177/2047487314553736  
21  
22  
23  
24  
25  
26 29 George K, Whyte G, Stephenson C, *et al.* Postexercise left ventricular function and  
27 cTnT in recreational marathon runners. *Med Sci Sport Exerc* 2004;**36**:1709–  
28 15.<http://www.ncbi.nlm.nih.gov/pubmed/15595291> (accessed 14 Jul 2015).  
29  
30  
31  
32  
33 30 Utomi V, Oxborough D, Whyte GP, *et al.* Systematic review and meta-analysis of  
34 training mode, imaging modality and body size influences on the morphology and  
35 function of the male athlete’s heart. *Heart* 2013;**99**:1727–33. doi:10.1136/heartjnl-  
36 2012-303465  
37  
38  
39  
40  
41  
42  
43 31 Gaudreault V, Tizon-Marcos H, Poirier P, *et al.* Transient myocardial tissue and  
44 function changes during a marathon in less fit marathon runners. *Can J Cardiol*  
45 2013;**29**:1269–76. doi:10.1016/j.cjca.2013.04.022  
46  
47  
48  
49  
50  
51 32 Karlstedt E, Chelvanathan A, Da Silva M, *et al.* The impact of repeated marathon  
52 running on cardiovascular function in the aging population. *J Cardiovasc Magn Reson*  
53 2012;**14**:58. doi:10.1186/1532-429X-14-58  
54  
55  
56  
57  
58 33 Wilson M, O’Hanlon R, Prasad S, *et al.* Diverse patterns of myocardial fibrosis in  
59  
60

1  
2  
3  
4  
5  
6  
7 Herm et al., ECG changes during a marathon race  
8  
9

10  
11 lifelong, veteran endurance athletes. *J Appl Physiol* 2011;**110**:1622–6.

12  
13 doi:10.1152/jappphysiol.01280.2010  
14

- 15  
16 34 La Gerche A, Burns AT, Mooney DJ, *et al.* Exercise-induced right ventricular  
17  
18 dysfunction and structural remodelling in endurance athletes. *Eur Hear J* 2012;**33**:998–  
19  
20 1006. doi:10.1093/eurheartj/ehr397  
21  
22  
23  
24  
25  
26  
27  
28  
29  
30  
31  
32  
33  
34  
35  
36  
37  
38  
39  
40  
41  
42  
43  
44  
45  
46  
47  
48  
49  
50  
51  
52  
53  
54  
55  
56  
57  
58  
59  
60

Herm et al., ECG changes during a marathon race

**Table 1:** Baseline characteristics of the 107 participants of the “Berlin Beat of Running” study who finished the marathon and who had evaluable ECG data.

|                                                   |                  |
|---------------------------------------------------|------------------|
| Age; mean; years; median [IQR]                    | 48 [45-53]       |
| Female gender; % (n)                              | 24.3 (26)        |
| Body mass index; kg/m <sup>2</sup> ; median [IQR] | 23.4 [21.6-24.7] |
| Hypertension; % (n)                               | 8.4 (9)          |
| Diabetes mellitus; % (n)                          | 0 (0)            |
| Heart failure; % (n)                              | 0 (0)            |
| Coronary artery disease; % (n)                    | 0 (0)            |
| Hyperlipidemia; % (n)                             | 2.8 (3)          |
| Current smoking; % (n)                            | 6.5 (7)          |
| Medication at enrolment                           |                  |
| Antiplatelet; % (n)                               | 0.9 (1)          |
| Oral anticoagulant; % (n)                         | 0                |
| Beta-blocker; % (n)                               | 1.9 (2)          |
| Statin; % (n)                                     | 1.9 (2)          |
| Antihypertensive; % (n)                           | 6.5 (7)          |

Herm et al., ECG changes during a marathon race

**Table 2:** Cardiovascular risk profile and training status in leisure athletes with or without abnormal ECG findings, respectively. ST segment deviation, atrio- or ventricular arrhythmias (atrio-ventricular block grade IIb or III, triplets, non-sustained ventricular tachycardia, supraventricular tachycardia) or atrial fibrillation were regarded as abnormal findings.

|                                                | Normal<br>ECG<br>n=89 | Abnormal<br>ECG<br>n=18 | Univariate<br>Analysis<br>p-value * | Multivariate<br>Analysis<br>OR (95%CI) |
|------------------------------------------------|-----------------------|-------------------------|-------------------------------------|----------------------------------------|
| Age; years; median [IQR]                       | 48 [44-50]            | 54 [48-59]              | 0.004                               | 1.11 (1.01-1.23)                       |
| Female gender, % (n)                           | 24.7 (22)             | 22.2 (4)                | 0.822                               |                                        |
| Physical activity                              |                       |                         |                                     |                                        |
| Marathon runs ≤ 5 years; median [IQR]          | 5 [4 -10]             | 6 [4-7]                 | 0.923                               |                                        |
| Marathon runs total; n; median [IQR]           | 9 [5-18]              | 7 [6-14]                | 0.573                               |                                        |
| Current running; km/week; median [IQR]         | 65 [50-80]            | 58 [50-70]              | 0.151                               |                                        |
| Regular running; km/ week; median [IQR]        | 40 [30-50]            | 40 [30-50]              | 0.409                               |                                        |
| Present marathon time; min; median [IQR]       | 238 [215-268]         | 275 [229-326]           | 0.009                               | 1.44 (0.98-2.12)                       |
| Hematocrit post-race; %; median [IQR]          | 0.44 [0.41-0.45]      | 0.43 [0.41-0.45]        | 0.711                               |                                        |
| Body Mass Index; kg/m <sup>2</sup> ; mean ± SD | 23.2±2.2              | 23.6±1.9                | 0.449                               |                                        |
| Comorbidities                                  |                       |                         |                                     |                                        |
| Hypertension; % (n)                            | 6.7 (6)               | 16.7 (3)                | 0.166                               |                                        |
| Hyperlipidaemia; % (n)                         | 2.2 (2)               | 2.8 (3)                 | 0.438                               |                                        |

Herm et al., ECG changes during a marathon race

|                        |         |          |       |
|------------------------|---------|----------|-------|
| Current smoking; % (n) | 5.6 (5) | 11.1 (2) | 0.390 |
|------------------------|---------|----------|-------|

*Values are expressed in % (n), mean  $\pm$  SD or median [IQR] as appropriate; \* p-value calculated by  $\chi^2$ -test or Mann-Whitney U test, as appropriate. Multivariate analysis was calculated in a binary logistic regression model using backwards selection.*

**Table 3:** Troponin T elevation post-marathon in the 107 athletes who finished the marathon race and who had evaluable ECG data.

|                                                | <b>Troponin<br/>T<br/>&lt; 50 ng/L<br/>n=89</b> | <b>Troponin<br/>T<br/>≥ 50 ng/L<br/>n=18</b> | <b>Univariate<br/>Analysis<br/>p-value *</b> | <b>Multivariate<br/>Analysis<br/>OR (95%CI)</b> |
|------------------------------------------------|-------------------------------------------------|----------------------------------------------|----------------------------------------------|-------------------------------------------------|
| Age; years; median [IQR]                       | 48 [45-52]                                      | 49 [45-53]                                   | 0.605                                        |                                                 |
| Female gender; % (n)                           | 21.3 (19)                                       | 38.9 (7)                                     | 0.114                                        |                                                 |
| Body mass index; kg/m <sup>2</sup> ; mean ± SD | 23 [22-25]                                      | 23 [22-25]                                   | 0.723                                        |                                                 |
| Present marathon time; min; median [IQR]       | 236 [217-269]                                   | 268 [237-309]                                | 0.040                                        | 1.25 (0.83 – 1.87)                              |
| Marathon runs ≤ 5 y; n; median [IQR]           | 6 [4-10]                                        | 5 [3-8]                                      | 0.327                                        |                                                 |
| Marathon runs total; n; median [IQR]           | 9 [6-18]                                        | 7 [5-12]                                     | 0.147                                        |                                                 |
| Regular weekly running; km; median [IQR]       | 40 [30-50]                                      | 40 [30-50]                                   | 0.791                                        |                                                 |
| Coexisting hypertension; % (n)                 | 9.0 (8)                                         | 5.6 (1)                                      | 0.632                                        |                                                 |
| Hyperlipidaemia; % (n)                         | 3.4 (3)                                         | 0 (0)                                        | 0.429                                        |                                                 |
| ST-segment deviation; % (n)                    | 3.4 (3)                                         | 27.8 (5)                                     | <0.0001                                      | 9.9 (1.90 – 51.5)                               |
| Arrhythmias; % (n)                             | 11.2 (10)                                       | 5.6 (1)                                      | 0.469                                        |                                                 |
| Troponin pre-race; µg/L; median [IQR]          | 0.012 [0.012-0.012]                             | 0.012 [0.012-0.012]                          | 0.131                                        |                                                 |
| Creatinine pre-race; mg/dL; median [IQR]       | 0.86 [0.81-0.96]                                | 0.85 [0.77-0.97]                             | 0.761                                        |                                                 |
| Creatinine post-race; mg/dL; median [IQR]      | 1.27 [1.11-1.46]                                | 1.34 [1.17-1.48]                             | 0.424                                        |                                                 |
| CK post-race; U/L; median [IQR]                | 333 [250-412]                                   | 350 [291-611]                                | 0.263                                        |                                                 |

Herm et al., ECG changes during a marathon race

|                                          |                   |             |       |                              |
|------------------------------------------|-------------------|-------------|-------|------------------------------|
| CK-MB post-race; U/L;<br>median [IQR]    | 35 [28-41]        | 33 [29-52]  | 0.609 |                              |
| Hematocrit post-race; %;<br>median [IQR] | <u>44 [42-46]</u> | 41 [39-44]) | 0.003 | <u>0.76</u><br>(0.62 – 0.92) |

*Values are expressed in % (n), mean ± SD or median [IQR] as appropriate; \* p-value calculated by  $\chi^2$  – test or Mann-Whitney U test, as appropriate. Multivariate analysis was calculated in a binary logistic regression model using backwards selection.*

**Figure 1:** Non-sustained ventricular tachycardia in a well-trained 48-year old male endurance runner without cardiovascular risk factors despite smoking.

**Figure 2:** ECG at rest (A) and exercise-induced ST segment deviations (B) in a 60-year old male endurance runner without cardiovascular risk.



**ONLINE SUPPLEMENT** High-sensitive troponin T (hsTnT) values returned to normal within up to 58 hours after the marathon race in almost all athletes (95%). Creatine kinase (CK) remains elevated in all 21 athletes (with ST-segment deviation and/or hsTnT elevation).

**Table ONLINE SUPPLEMENT:** Characteristics of 21 athletes with either ST-segment deviation (>1 mm) and hsTnT elevation ( $\geq 50$  ng/L) (n=5), ST-segment deviation (n=3) or hsTnT elevation (n=13). Pathological findings are labeled in bold.

| Age | Sex    | Medication       | Cardiovascular risk factors | NSVT <sup>§</sup> | ST-segment deviation | hsTnT <sup>§</sup> ng/L* | hsTnT ng/L** | CK-MB mg/dL* | CK-MB mg/dL** | CK mg/dL* | CK mg/dL** | Cardiac MRI |
|-----|--------|------------------|-----------------------------|-------------------|----------------------|--------------------------|--------------|--------------|---------------|-----------|------------|-------------|
| 45  | Female | None             | No                          | No                | <b>Yes</b>           | <b>91</b>                | 19           | 21           | 32            | 877       | 1194       | Yes         |
| 45  | Female | L-Thyroxin       | No                          | No                | <b>Yes</b>           | <b>71</b>                | 12           | 18           | 16            | 243       | 235        | Yes         |
| 53  | Male   | None             | No                          | No                | <b>Yes</b>           | <b>63</b>                | 14           | 14           | 35            | 893       | 2121       | Yes         |
| 59  | Male   | None             | No                          | No                | <b>Yes</b>           | <b>66</b>                | 12           | 19           | 54            | 406       | 2236       | Yes         |
| 60  | Male   | None             | Smoker                      | <b>Yes</b>        | <b>Yes</b>           | <b>70</b>                | 12           | 27           | 72            | 2867      | 3625       | Yes         |
| 48  | Male   | None             | No                          | No                | <b>Yes</b>           | <b>32</b>                | 16           | 18           | 44            | 381       | 1719       | No          |
| 55  | Male   | None             | No                          | No                | <b>Yes</b>           | <b>21</b>                | 12           | 21           | 35            | 201       | 489        | No          |
| 60  | Male   | Antihypertensive | Hypertension                | No                | <b>Yes</b>           | <b>27</b>                | 13           | 28           | 44            | 767       | 1979       | No          |
| 44  | Female | None             | Smoker                      | No                | No                   | <b>78</b>                | 12           | 26           | 20            | 306       | 192        | Yes         |
| 48  | Male   | None             | No                          | No                | No                   | <b>138</b>               | 20           | 59           | 67            | 325       | 2186       | Yes         |
| 49  | Female | None             | No                          | No                | No                   | <b>63</b>                | 12           | 22           | 41            | 205       | 1357       | Yes         |
| 50  | Male   | None             | No                          | No                | No                   | <b>87</b>                | 29           | 30           | 73            | 360       | 3462       | Yes         |
| 60  | Female | None             | No                          | No                | No                   | <b>216</b>               | 64           | 33           | 14            | 455       | 169        | Yes         |
| 39  | Male   | None             | No                          | No                | No                   | <b>59</b>                | 23           | 47           | 87            | 583       | 2756       | No          |
| 40  | Female | None             | No                          | No                | No                   | <b>85</b>                | 12           | 42           | 33            | 696       | 914        | No          |
| 45  | Male   | None             | No                          | No                | No                   | <b>83</b>                | 29           | 175          | 157           | 195       | 605        | No          |
| 47  | Male   | None             | No                          | No                | No                   | <b>52</b>                | 12           | 37           | 42            | 309       | 1983       | No          |
| 48  | Male   | None             | No                          | No                | No                   | <b>64</b>                | 12           | 52           | 101           | 405       | 4604       | No          |
| 50  | Female | Antihypertensive | Hypertension                | No                | No                   | <b>50</b>                | 12           | 29           | 28            | 315       | 485        | No          |
| 53  | Female | None             | No                          | No                | No                   | <b>62</b>                | 12           | 30           | 24            | 339       | 448        | No          |
| 54  | Male   | None             | No                          | No                | No                   | <b>67</b>                | 15           | 33           | 23            | 234       | 409        | No          |

<sup>§</sup> non-sustained ventricular tachycardia; <sup>§</sup> high-sensitive Troponin T; \* within 30 minutes post-race; \*\* up to 58 hours after the race

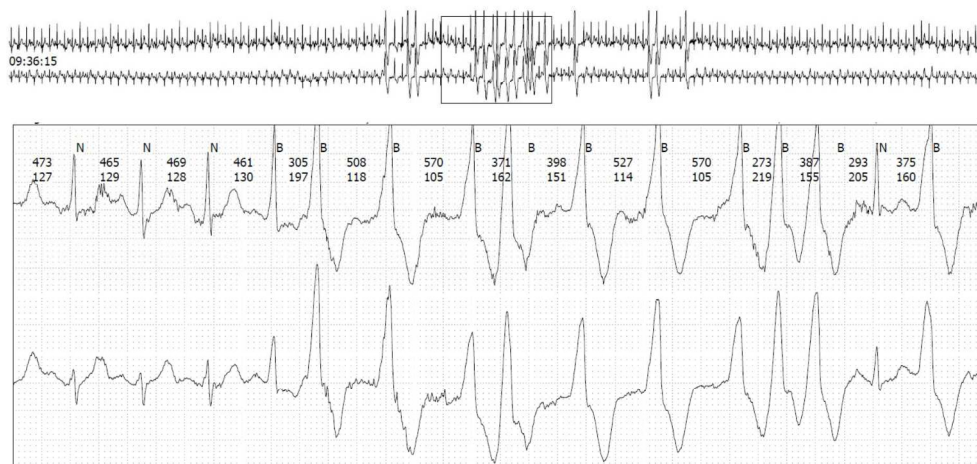

Figure 1: Non-sustained ventricular tachycardia in a well-trained 48-year old male endurance runner without cardiovascular risk factors despite smoking.

297x151mm (300 x 300 DPI)

review only

## STROBE Statement—checklist of items that should be included in reports of observational studies

|                          | Item No | page                     | Recommendation                                                                                                                                                                             |
|--------------------------|---------|--------------------------|--------------------------------------------------------------------------------------------------------------------------------------------------------------------------------------------|
| Title and abstract       | 1       | 2                        | (a) Indicate the study's design with a commonly used term in the title or the abstract                                                                                                     |
|                          |         | 2                        | (b) Provide in the abstract an informative and balanced summary of what was done and what was found                                                                                        |
| <b>Introduction</b>      |         |                          |                                                                                                                                                                                            |
| Background/rationale     | 2       | 3                        | Explain the scientific background and rationale for the investigation being reported                                                                                                       |
| Objectives               | 3       | 4                        | State specific objectives, including any prespecified hypotheses                                                                                                                           |
| <b>Methods</b>           |         |                          |                                                                                                                                                                                            |
| Study design             | 4       | 4                        | Present key elements of study design early in the paper                                                                                                                                    |
| Setting                  | 5       | 4                        | Describe the setting, locations, and relevant dates, including periods of recruitment, exposure, follow-up, and data collection                                                            |
| Participants             | 6       | 4                        | (a) <i>Cohort study</i> —Give the eligibility criteria, and the sources and methods of selection of participants. Describe methods of follow-up                                            |
|                          |         |                          | <i>Case-control study</i> —Give the eligibility criteria, and the sources and methods of case ascertainment and control selection. Give the rationale for the choice of cases and controls |
|                          |         |                          | <i>Cross-sectional study</i> —Give the eligibility criteria, and the sources and methods of selection of participants                                                                      |
| Variables                | 7       | 7                        | (b) <i>Cohort study</i> —For matched studies, give matching criteria and number of exposed and unexposed                                                                                   |
|                          |         |                          | <i>Case-control study</i> —For matched studies, give matching criteria and the number of controls per case                                                                                 |
| Data sources/measurement | 8*      | 5-6                      | Clearly define all outcomes, exposures, predictors, potential confounders, and effect modifiers. Give diagnostic criteria, if applicable                                                   |
| Bias                     | 9       | 13                       | For each variable of interest, give sources of data and details of methods of assessment (measurement). Describe comparability of assessment methods if there is more than one group       |
| Study size               | 10      | 4 (Ref. to design paper) | Describe any efforts to address potential sources of bias                                                                                                                                  |
| Quantitative variables   | 11      | 7                        | Explain how the study size was arrived at                                                                                                                                                  |
| Statistical methods      | 12      | 7                        | Explain how quantitative variables were handled in the analyses. If applicable, describe which groupings were chosen and why                                                               |
|                          |         |                          | (a) Describe all statistical methods, including those used to control for confounding                                                                                                      |
|                          |         |                          | (b) Describe any methods used to examine subgroups and interactions                                                                                                                        |
|                          |         |                          | (c) Explain how missing data were addressed                                                                                                                                                |
|                          | n.a.    |                          | (d) <i>Cohort study</i> —If applicable, explain how loss to follow-up was addressed                                                                                                        |
|                          | n.a.    |                          | <i>Case-control study</i> —If applicable, explain how matching of cases and controls was addressed                                                                                         |

*Cross-sectional study*—If applicable, describe analytical methods taking account of sampling strategy

n.a. (g) Describe any sensitivity analyses

Continued on next page

| <b>Results</b>           |     | <b>page</b>                                                                                                                                                                                                  |         |
|--------------------------|-----|--------------------------------------------------------------------------------------------------------------------------------------------------------------------------------------------------------------|---------|
| Participants             | 13* | (a) Report numbers of individuals at each stage of study—eg numbers potentially eligible, examined for eligibility, confirmed eligible, included in the study, completing follow-up, and analysed            | 8       |
|                          |     | (b) Give reasons for non-participation at each stage                                                                                                                                                         | 8       |
|                          |     | (c) Consider use of a flow diagram                                                                                                                                                                           | n.a.    |
| Descriptive data         | 14* | (a) Give characteristics of study participants (eg demographic, clinical, social) and information on exposures and potential confounders                                                                     | Table 1 |
|                          |     | (b) Indicate number of participants with missing data for each variable of interest                                                                                                                          | n.a.    |
|                          |     | (c) <i>Cohort study</i> —Summarise follow-up time (eg, average and total amount)                                                                                                                             |         |
| Outcome data             | 15* | <i>Cohort study</i> —Report numbers of outcome events or summary measures over time                                                                                                                          | 7-10    |
|                          |     | <i>Case-control study</i> —Report numbers in each exposure category, or summary measures of exposure                                                                                                         |         |
|                          |     | <i>Cross-sectional study</i> —Report numbers of outcome events or summary measures                                                                                                                           |         |
| Main results             | 16  | (a) Give unadjusted estimates and, if applicable, confounder-adjusted estimates and their precision (eg, 95% confidence interval). Make clear which confounders were adjusted for and why they were included | 7-10    |
|                          |     | (b) Report category boundaries when continuous variables were categorized                                                                                                                                    | 7-10    |
|                          |     | (c) If relevant, consider translating estimates of relative risk into absolute risk for a meaningful time period                                                                                             | n.a.    |
| Other analyses           | 17  | Report other analyses done—eg analyses of subgroups and interactions, and sensitivity analyses                                                                                                               | n.a.    |
| <b>Discussion</b>        |     |                                                                                                                                                                                                              |         |
| Key results              | 18  | Summarise key results with reference to study objectives                                                                                                                                                     | 11      |
| Limitations              | 19  | Discuss limitations of the study, taking into account sources of potential bias or imprecision. Discuss both direction and magnitude of any potential bias                                                   | 13      |
| Interpretation           | 20  | Give a cautious overall interpretation of results considering objectives, limitations, multiplicity of analyses, results from similar studies, and other relevant evidence                                   | 12      |
| Generalisability         | 21  | Discuss the generalisability (external validity) of the study results                                                                                                                                        | 13      |
| <b>Other information</b> |     |                                                                                                                                                                                                              |         |
| Funding                  | 22  | Give the source of funding and the role of the funders for the present study and, if applicable, for the original study on which the present article is based                                                | 14      |

\*Give information separately for cases and controls in case-control studies and, if applicable, for exposed and unexposed groups in cohort and cross-sectional studies.

**Note:** An Explanation and Elaboration article discusses each checklist item and gives methodological background and published examples of transparent reporting. The STROBE checklist is best used in conjunction with this article (freely available on the Web sites of PLoS Medicine at <http://www.plosmedicine.org/>, Annals of Internal Medicine at <http://www.annals.org/>, and Epidemiology at <http://www.epidem.com/>). Information on the STROBE Initiative is available at [www.strobe-statement.org](http://www.strobe-statement.org).

# BMJ Open

## Frequency of exercise-induced ST-segment deviations and cardiac arrhythmias in recreational endurance athletes during a marathon race: results of the prospective observational Berlin Beat of Running study

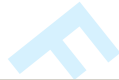

|                                 |                                                                                                                                                                                                                                                                                                                                                                                                                                                                                                                                                                                                                                                                                                                                                                                                                                                                                                                                                                                                                                                                                                                                              |
|---------------------------------|----------------------------------------------------------------------------------------------------------------------------------------------------------------------------------------------------------------------------------------------------------------------------------------------------------------------------------------------------------------------------------------------------------------------------------------------------------------------------------------------------------------------------------------------------------------------------------------------------------------------------------------------------------------------------------------------------------------------------------------------------------------------------------------------------------------------------------------------------------------------------------------------------------------------------------------------------------------------------------------------------------------------------------------------------------------------------------------------------------------------------------------------|
| Journal:                        | <i>BMJ Open</i>                                                                                                                                                                                                                                                                                                                                                                                                                                                                                                                                                                                                                                                                                                                                                                                                                                                                                                                                                                                                                                                                                                                              |
| Manuscript ID                   | bmjopen-2016-015798.R2                                                                                                                                                                                                                                                                                                                                                                                                                                                                                                                                                                                                                                                                                                                                                                                                                                                                                                                                                                                                                                                                                                                       |
| Article Type:                   | Research                                                                                                                                                                                                                                                                                                                                                                                                                                                                                                                                                                                                                                                                                                                                                                                                                                                                                                                                                                                                                                                                                                                                     |
| Date Submitted by the Author:   | 26-May-2017                                                                                                                                                                                                                                                                                                                                                                                                                                                                                                                                                                                                                                                                                                                                                                                                                                                                                                                                                                                                                                                                                                                                  |
| Complete List of Authors:       | Herm, Juliane; Charite Universitätsmedizin Berlin, Department of Neurology<br>Toepper, Agnieszka; , Experimental and Clinical Research Center, Berlin, Germany, Working Group on Cardiovascular Magnetic Resonance<br>Wutzler, Alexander; Charite Universitätsmedizin Berlin,<br>Kunze, Claudia; Charite Universitätsmedizin Berlin, Center for Stroke Research Berlin<br>Kruell, Matthias; SMS Medical Institute Berlin GmbH<br>Brechtel, Lars; SMS Medical Institute Berlin GmbH<br>Lock, Juergen; SMS Medical Institute Berlin GmbH<br>Fiebach, Jochen; Charite Universitätsmedizin Berlin, Center for Stroke Research Berlin (CSB)<br>Heuschmann, Peter; Julius-Maximilians-Universität Würzburg Institut für deutsche Philologie, Institute of Clinical Epidemiology and Biometry<br>Haverkamp, Wilhelm; Charité Berlin, Department of Cardiology<br>Endres, Matthias; Charité-Universitätsmedizin Berlin, Center for Stroke Research Berlin<br>Jungehulsing, Gerhard; Charite Universitätsmedizin Berlin, Center for Stroke Research Berlin (CSB)<br>Haeusler, Karl Georg; Charite Universitätsmedizin Berlin, Department of Neurology |
| <b>Primary Subject Heading</b>: | Sports and exercise medicine                                                                                                                                                                                                                                                                                                                                                                                                                                                                                                                                                                                                                                                                                                                                                                                                                                                                                                                                                                                                                                                                                                                 |
| Secondary Subject Heading:      | Cardiovascular medicine                                                                                                                                                                                                                                                                                                                                                                                                                                                                                                                                                                                                                                                                                                                                                                                                                                                                                                                                                                                                                                                                                                                      |
| Keywords:                       | marathon, ecg, Magnetic resonance imaging < RADIOLOGY & IMAGING, arrhythmia, troponin                                                                                                                                                                                                                                                                                                                                                                                                                                                                                                                                                                                                                                                                                                                                                                                                                                                                                                                                                                                                                                                        |
|                                 |                                                                                                                                                                                                                                                                                                                                                                                                                                                                                                                                                                                                                                                                                                                                                                                                                                                                                                                                                                                                                                                                                                                                              |

SCHOLARONE™  
Manuscripts

1  
2  
3 **Frequency of exercise-induced ST-segment deviations and cardiac arrhythmias in**  
4 **recreational endurance athletes during a marathon race: results of the prospective**  
5 **observational Berlin Beat of Running study**  
6  
7  
8

9 Juliane Herm, MD<sup>1,2</sup>, Agnieszka Töpper, MD<sup>3-5</sup>, Alexander Wutzler, MD<sup>5</sup>, Claudia Kunze<sup>2</sup>  
10 BA, Matthias Krüll, MD<sup>6,7,8</sup>, Lars Brechtel, MD<sup>6,7,8</sup>, Jürgen Lock, MD<sup>6,7,8</sup>, Jochen B. Fiebach,  
11 MD<sup>2</sup>, Peter U. Heuschmann, MD<sup>9,10</sup>, Wilhelm Haverkamp, MD<sup>5</sup>, Matthias Endres,  
12 MD<sup>1,2,11,12,13</sup>, Gerhard Jan Jungehulsing, MD<sup>2,14\*</sup>, Karl Georg Haeusler, MD, FESC<sup>1,2\*</sup>  
13  
14  
15

16  
17  
18 <sup>1</sup>Department of Neurology, Charité - Universitätsmedizin Berlin, Germany; <sup>2</sup>Center for Stroke  
19 Research Berlin, Charité – Universitätsmedizin Berlin, Germany; <sup>3</sup>Working Group on  
20 Cardiovascular Magnetic Resonance, Experimental and Clinical Research Center, Berlin,  
21 Germany; <sup>4</sup>HELIOS Klinikum Berlin Buch, Department of Cardiology and Nephrology,  
22 Germany; <sup>5</sup>Department of Cardiology, Campus Virchow-Klinikum, Charité-  
23 Universitätsmedizin Berlin, Berlin, Germany; <sup>6</sup>SMS Medical Institute Berlin GmbH,  
24 Germany; <sup>7</sup>SCC EVENTS GmbH Berlin, Germany; <sup>8</sup>Berlin Academy of Sports Medicine,  
25 Germany; <sup>9</sup>Institute of Clinical Epidemiology and Biometry, University of Würzburg,  
26 Germany; <sup>10</sup>Clinical Trial Center Würzburg, University Hospital Würzburg, Germany;  
27  
28  
29  
30  
31  
32  
33  
34  
35  
36  
37  
38  
39  
40  
41  
42  
43  
44  
45  
46  
47  
48  
49  
50  
51  
52  
53  
54  
55  
56  
57  
58  
59  
60

<sup>11</sup>German Center for Neurodegenerative Diseases (DZNE), Partner Site Berlin, Germany;  
<sup>12</sup>German Center for Cardiovascular Diseases (DZHK), Partner Site Berlin, Germany; <sup>13</sup>  
Berlin Institute of Health, Germany; <sup>14</sup>Department of Neurology, Jüdisches Krankenhaus  
Berlin, Germany

\* Authors contributed equally

Short title: ECG changes during a marathon race

Corresponding author: Juliane Herm, MD

Charité - Universitätsmedizin Berlin, Campus Benjamin  
Franklin, Hindenburgdamm 30, 12203 Berlin, Germany

Phone +49-30-450560663 FAX +49-30-450560979

Herm et al., ECG changes during a marathon race

juliane.herm@charite.de

## Abstract

*Objectives:* While regular physical exercise has many health benefits, strenuous physical exercise may have a negative impact on cardiac function. The “Berlin Beat of Running” study focused on feasibility and diagnostic value of continuous ECG-monitoring in recreational endurance athletes during a marathon race. We hypothesized that cardiac arrhythmias and especially atrial fibrillation are frequently found in a cohort of recreational endurance athletes. The main secondary hypothesis was that pathological laboratory findings in these athletes are (in part) associated with cardiac arrhythmias.

*Design:* Prospective observational cohort study including healthy volunteers.

*Setting & Participants:* One hundred and nine experienced marathon runners wore a portable electrocardiogram (ECG) recorder during a marathon race in Berlin, Germany. Athletes underwent blood tests 2-3 days prior, directly after and 1-2 days after the race.

*Results:* Overall, 108 athletes (median 48 years (IQR 45-53), 24% female) completed the marathon in 249±43 min. Blinded ECG-analysis revealed abnormal findings during the marathon in 18 (16.8%) athletes. Ten (9.3%) athletes had at least one episode of non-sustained ventricular tachycardia, one of whom had atrial fibrillation; eight (7.5%) individuals showed transient ST-segment deviations. Abnormal ECG-findings were associated with advanced age (OR 1.11 per year [95%CI 1.01-1.23]); while sex and cardiovascular risk profile had no impact. Directly after the race, high-sensitive troponin T was elevated in 18

Herm et al., ECG changes during a marathon race

(16.7%) athletes and associated with ST-segment deviation (OR 9.9 [95%CI 1.9-51.5]), while age, sex and cardiovascular risk profile had no impact.

*Conclusions:* ECG-monitoring during a marathon is feasible. Abnormal ECG-findings were present in every sixth athlete. Exercise-induced transient ST-segment deviations were associated with elevated hsTnT values.

*Trial registration:* clinicaltrials.gov NCT01428778.

*Keywords:* Marathon – ECG – magnetic resonance imaging – arrhythmia – troponin

### **Strengths and limitations**

- This is so far the largest study demonstrating feasibility of non-invasive ECG recording during a marathon race.
- More than one hundred experienced marathon runners underwent a unique serial blood sampling within 2-3 days before the marathon, directly after crossing the finish-line and 1-2 days after the marathon race.
- Cardiac MRI was performed in a subset of athletes with abnormal ECG findings and/or elevated troponin T values.
- Serial echocardiography and a standardized exercise capacity testing would have allowed for a more comprehensive interpretation of the results.

### **Introduction**

Regular physical exercise has many health benefits: improving blood pressure control, insulin sensitivity and lipid profiles, it reduces overall mortality and disability [1] and the number of



Herm et al., ECG changes during a marathon race

cardiovascular events [2,3]. Moreover, regular physical exercise also reduces the risk of certain cancers [4] and the number of mood disorders [5]. However, highly strenuous physical exercise may have a negative impact on cardiovascular health [6]. While marathon running has become a popular sport, cardiac arrest is rare but occurs in about 1:100,000 marathon runners, most commonly in those with hypertrophic cardiomyopathy or atherosclerotic coronary disease [7]. Available data on incidence of myocardial infarction after running a marathon is limited to case reports [8] and the prospective *RACE* Paris Registry [9], but elevated levels of troponin – a sensitive biomarker of cardiac injury – were reported in a relevant subset of asymptomatic marathon runners [10–12]. Other potentially harmful effects of strenuous exercise, like right ventricular dysplasia and ventricular arrhythmia, have also been reported for triathletes and other ultra-endurance athletes [13–15]. Moreover, a meta-analysis of mostly retrospective and small case-control series as well as a recent cohort study indicated that intense endurance sport increases the long-term risk of atrial fibrillation [16,17]. The EHRA consortium has recently updated its recommendations regarding abnormal ventricular arrhythmias in endurance athletes and stated that a non-sustained ventricular tachycardia (nsVT) requires diagnostic evaluation for latent hypertrophic cardiomyopathy or ischemic heart disease, especially if these occur under physical exercise [18]. However, there are so far very few publications regarding cardiac arrhythmias occurring during endurance sport [19–22].

Herewith, we report the results of the prospective observational “Berlin Beat of Running” study [23], demonstrating feasibility of continuous ECG-monitoring in 108 recreational endurance athletes during a marathon race. The pre-defined primary aim of the study was to

Herm et al., ECG changes during a marathon race

analyze the frequency of cardiac arrhythmias and especially atrial fibrillation in a cohort of recreational endurance athletes. Pre-defined secondary aims were as follows: (1) to assess risk factors associated with cardiac arrhythmias in marathon runners; (2) to analyze the association between laboratory findings and the presence of cardiac arrhythmias during the race and (3) to investigate whether marathon runners with elevated troponin levels (after the race) have MRI-detected myocardial scars suggestive of previous myocardial infarction.

## Methods

### *Study design*

The “Berlin Beat of Running” study is a prospective, observational, investigator-initiated cohort study. The study design has been published in detail [23]. In short, all pre-registered participants were informed by the organizers of the marathon about the study, and they contacted the study personnel if they were interested. Participants aged 35-60 years with at least 2 marathon runs within the last 5 years and an average training of 40 km running per week were enrolled after giving written informed consent. Exclusion criteria included known cardiac disease or arrhythmia, prior stroke, tumor or infectious disease, severe liver or kidney disease, hyperthyroidism, pregnancy or lactation. Continuous ECG recording (using the CardioMem<sup>®</sup> CM 4000 provided by GETEMED AG, Teltow, Germany) was started in 109 study participants up to 74 hours before the 38<sup>th</sup> BMW BERLIN MARATHON and continued throughout the entire race and for up to 58 hours afterwards. Laboratory assessment including hsTnT measurement with chemiluminescence immunoassays (Roche Diagnostics, Mannheim, Germany; cut-off 12 µg/L) was performed up to 74 hours before, within 30 minutes post-race

Herm et al., ECG changes during a marathon race

and for up to 58 hours after the race. The study protocol is in accordance with the Helsinki declaration and was approved by the Ethics Committee of the Charité - Universitätsmedizin Berlin (EA4/042/11). The primary hypothesis was: Cardiac arrhythmias and especially atrial fibrillation is frequently found in experienced marathon runners. Therefore, the primary outcome is the number of marathon runners with newly diagnosed cardiac arrhythmias. The main secondary hypotheses were: (1) There are predictable risk factors associated with cardiac arrhythmias in marathon runners; (2) Pathological laboratory findings are (in part) associated with cardiac arrhythmias; (3) Marathon runners with elevated troponin levels do not have MRI-detected myocardial scars suggestive of myocardial infarction. Follow-up information on past medical history was assessed one year after the marathon.

### ***MRI analysis***

A cardiac MRI after the race was offered to all study participants with either ST-segment deviation or hsTnT elevation. 3T MRI (Magnetom Tim Trio; Siemens AG, Erlangen, Germany) was performed using a phased array receiver coil during breath-holds gated to the electrocardiogram (Body Matrix-coil #TATS; Siemens AG). Cine images of 3 long-axis and 14-18 short-axis views (slices of 4 mm) were created using a steady state free precession technique [24]. Eight minutes after i.v. administration of 10-12 ml Gadovist<sup>®</sup> (Bayer Schering Pharma AG, Berlin, Germany) at a concentration of 1 mmol/ml, these views were repeated using a short inversion recovery sequence and continuously adjusting the inversion time [25].

### ***ECG analysis***

Herm et al., ECG changes during a marathon race

ECG monitoring was performed using a two-channel portable ECG recorder (CardioMem<sup>®</sup> CM 4000; GETEMED AG, Teltow, Germany). The cardiologists (AT, AW, WH) who analyzed the ECG data were blinded for demographic, clinical or laboratory data. The five recorded leads were placed as follows in order to obtain two independent bipolar channels: left (1) and right (2) on the first intercostal space, right on the sixth intercostal space parasternal (3) and mid-clavicular line (4), left ninth intercostal space mid-clavicular line (5). As there are no published recommendations on interpretation of a Holter-ECG in athletes, we followed recommendations available for interpreting a 12-lead ECG in athletes [26] as well as recent EHRA guidelines on ventricular arrhythmias [18]. In line with this, we defined an abnormal ECG as presence of ST-segment deviation under physical exercise or arrhythmias. Low-pass-filtering was set at 0.05 Hz in order to detect changes in the ST-T-segment. The ST-segment was considered abnormal in the virtually artifact free 2-lead ECG if horizontal or down-sloping  $\geq 1$  mm occurred over the 60 ms after the J-junction (80 ms if the heart rate was  $<120$  beats/min) [27]. ST-segments were analyzed in relation to the TP segment. Segments were analyzed after recording of stable isoelectric TP segments in three consecutive beats. If single QRS complexes showed notching, slurring or fragmentation, QRS and ST intervals were excluded from further analysis. Episodes lasting more than 30 seconds preceded and followed by regular ECG recording were also considered abnormal. Drezner et al. defined atrial arrhythmias as atrio-ventricular (AV) block grade IIb or III, atrial fibrillation or supraventricular tachycardia (SVT) [26]. Ventricular arrhythmias were defined as nsVT of at least three premature ventricular complexes (PVC) and a heart rate of  $\geq 100$  beats per minute [18,26].

Herm et al., ECG changes during a marathon race

### ***Statistical analysis***

In accordance with the sample size calculation, we planned to include 110 participants into the study [23]. For categorical data, absolute and relative frequencies were calculated using SPSS statistics 22. In the case of continuous variables with nearly normal distribution, we used the arithmetic mean, standard deviation, minimal and maximal values, otherwise median, quartiles, minimal and maximal values. The *Chi* quadrat test was used to compare proportions for dichotomous outcomes between independent groups or to test independency of two dichotomous variables within a population. Outcomes in an ordinal scale or continuous outcomes were analyzed using the t-test or the Mann-Whitney test, depending on normality or non-normality of distribution. A p-value of  $<0.05$  was considered to be statistically significant. In multivariate analysis, potential impact factors identified on a  $p<0.05$  level in univariate analysis were entered in a binary logistic regression model using backwards selection.

## **Results**

### ***Baseline data of study participants and feasibility of ECG recording***

Overall, 109 (99.1%) of 110 study participants took part, and 108 (98.2%) participants finished the 38<sup>th</sup> BMW BERLIN MARATHON 2011 in an average running time of  $249\pm 43$  min. September 25, 2011, was a sunny day in Berlin and temperatures reached a maximum of 22 degrees Celsius. Data quality of long-term Holter-ECG was sufficient to ensure assessment of arrhythmias and ST-segment deviations in 107 (98.2%) athletes, although motion and

Herm et al., ECG changes during a marathon race

perspiration artifacts were present in the majority of athletes. In one athlete's device, a technical error occurred. Consistently wearing the ECG recorder on the upper arm using a carrier bag, no athlete reported problems in this regard. No athlete stopped wearing the ECG device prematurely. Baseline characteristics of these 107 participants are depicted in **Table 1**. The median age of these 107 participants was 48 years; 23.9% were female. The cardiovascular risk profile was low. The participants had run a median of 5 marathon races within the last 5 years and a median of 8 marathon races in total. Their average weekly running distance prior to the race was 40 km (IQR 30-50 km). In addition, athletes regularly went cycling (44.9%; n=48) or swimming (18.7%; n=20), respectively.

### ***Cardiac arrhythmias or ST-segment deviation during the marathon***

During the race, mean heart rate was 156.7±9.4 beats per minute. Minimum and maximum median heart rate were 133 (IQR 120-142) and 172 (IQR 166-177) beats per minute, respectively. We observed nsVT in 10 (9.4%) athletes (**Figure 1**), 2 (20%) of whom were female. In athletes with nsVTs, the median number of beats was 3 (IQR 3-5; range 3-9), median rate was 166 beats per minute (IQR 149-188; range 133-224) and median duration of the recorded nsVT was 1121 ms (IQR 919-1841; range 901-4400). We did not observe an AV block or a SVT. Persistent atrial fibrillation was found in one male patient (0.9%). Filtering of the monitors allowed interpretation of ST-T wave changes in fashion similar to a standard ECG. Exercise-induced ST-segment deviations occurred in eight (7.5%) study participants during the marathon race (**Figure 2**), 2 (25%) of whom were female. Characteristics of all athletes with ST-segment deviation are displayed in the *online supplement*. Intensity of ST-

Herm et al., ECG changes during a marathon race

segment deviation in terms of ST-level was -0.7 mV (IQR -0.8 to -0.3; range -0.9 to -0.16). ECG monitoring was prolonged for up to 54 hours (median 28 hours) after the marathon race. ST-segment deviations were not found in any athlete with ST-segment deviation during the marathon. One of these eight athletes also had nsVT. While four (3.7%) athletes reported palpitations during the marathon race, one had AF, one had a single nsVT (lasting nine beats) and another athlete had multiple supraventricular premature beats (62/hour). No athlete reported cardiac pain or dyspnea. An abnormal ECG according to pre-defined criteria was found in 16.8% (n=18) of all participants. In univariate analysis, advanced age (p=0.004) and a longer marathon finishing time (p=0.009) were associated with abnormal ECG findings, while sex, cardiovascular risk profile, hematocrit post-race and the number of previous marathons were not. In multivariate analysis, advanced age remained significant (OR 1.11 per year [95%CI 1.01-1.23]) (**Table 2**). In addition, athletes with an abnormal ECG had a higher frequency of PVCs (median 3.0 (IQR 1.0-12.3) versus 23.5 (IQR 10.0-44.0), p<0.001) during the marathon race.

### ***Cardiac biomarkers and ECG changes during the marathon***

At baseline, hsTnT was normal in all marathon runners (<50 ng/L). Within minutes after the race was finished, hsTnT was elevated above 50 ng/L) in 18 (16.8%) participants and median hsTnT was 3 ng/L (IQR 2-4; range 1-22). Median hsTnT values in 18 athletes with elevated hsTnT was 68.5 ng/L (IQR 62.8-85.5, range 50-216). Characteristics of all athletes with elevated hsTnT are displayed in the *online supplement*. In all athletes, median creatinine kinase (CK) and CK-MB were 130 U/l (IQR 103–176) and 20 U/l (IQR 17–24) pre-marathon,

Herm et al., ECG changes during a marathon race

respectively. Post-marathon CK was 336 (IQR 252-417) U/l and CK-MB was 35 (IQR 29-41) U/l.

Comparing athletes with an elevated hsTnT post-marathon to those without, we found no difference in age, sex, cardiovascular risk factors, training level or post-marathon CK-MB values (**Table 3**). In runners with elevated hsTnT, we found more frequent ST-segment deviations ( $p < 0.0001$ ) but no association with cardiac arrhythmias. In addition, elevated hsTnT was found in individuals with a longer marathon finishing time ( $p = 0.040$ ). Athletes with elevated hsTnT had a lower hematocrit compared to athletes without hsTnT elevation ( $p = 0.003$ ). In multivariate analysis, ST-segment deviation (OR 9.9 [95%CI 1.9-51.5]) as well as hematocrit (OR 0.76 per percent [95%CI 0.62-0.92]) remained statistically significant. Within 48 hours post-marathon, hsTnT was within normal range in 106 (99.1%) athletes; one athlete with no substantial ECG alterations during the marathon showed a persisting hsTnT elevation but normal 12-lead ECG post-marathon. Follow-up information was available for all eight athletes with ST-segment deviation and for eight out of ten patients with nsVT during the race. None of the athletes reported a cardiovascular event within one year after the race.

#### ***Cardiac MRI in athletes with ST-segment deviation or elevated hsTnT***

Cardiac MRI was offered to all study participants with ST-segment deviation or hsTnT elevation. Five out of eight athletes with ST-segment deviation and hsTnT elevation as well as in five out of 18 athletes with hsTnT elevation but without ST-segment deviation underwent MRI within 10-42 days after the marathon race. Age, sex and cardiovascular risk factors did not differ in the 10 athletes undergoing cardiac MRI and the 14 athletes who did



Herm et al., ECG changes during a marathon race

not undergo cardiac MRI. Cardiac MRI revealed no pathological findings for cardiac function and there was no late gadolinium enhancement indicating myocardial fibrosis. Additional cardiac work-up was strongly recommended in all patients with pathological ECG-findings.

## Discussion

This is so far the largest study demonstrating feasibility of ECG recording during a marathon race, which may help counseling a subset of endurance athletes regarding exercise-associated complications. One main finding of the “Berlin Beat of Running” study is the unexpectedly high rate of abnormal ECG findings in 17% of recreational endurance athletes. Moreover, this is the first study reporting an association of transient ST-segment abnormalities during a marathon with elevated hsTnT levels after finishing the race. However, we cannot be sure that the observed ST-segment deviations are definitively based on silent ischemia.

So far, there is limited data on ECG abnormalities during vigorous exercise [28]. Franco et al. reported “no arrhythmias” in 19 male athletes during a marathon [21], while Aagaard et al. found “no ventricular arrhythmias” but atrial fibrillation in two (4%) of 49 male endurance runners during a 30 km race [22]. Luurila et al. reported the presence of ventricular premature complexes in 33 (89%) of 37 recreational athletes during a ski marathon as well as ST-segment deviations in 3 (8%) of these middle-aged men [20]. Most recently, Grabs et al. used a 1-lead wireless ECG and reported premature atrial contractions but no arrhythmias in 20 male runners during a marathon race [19]. In our prospective study, 10 (9.4%) out of 107 recreational endurance athletes had a non-sustained ventricular arrhythmia during the

Herm et al., ECG changes during a marathon race

marathon and one (0.9%) athlete had AF. In addition, ST-segment deviations (**Figure 2**) were detected in 8 (7.5%) athletes. Advanced age was associated with abnormal ECG findings (**Table 2**). According to the hematocrit, low hydration – potentially impacting on cardiac preload – was not linked to abnormal ECG findings. However, analyzing athletes with ST-segment deviations, atrial fibrillation or ventricular arrhythmias, the underlying mechanisms of these pathological conditions may differ and the results of the multivariate analysis do not apply to a single condition.

Despite the fact that increased levels of physical activity were associated with a lower relative risk of myocardial infarction, 4% of patients with myocardial infarction report having performed strenuous exercise within hours before the cardiovascular event [3]. By using different cut-offs, transient elevations in the level of troponin T or troponin I have previously been reported in 18-69% of marathon runners [10–12,29]. In the “Berlin Beat of Running” cohort, hsTnT was elevated in 18 (17%) out of 107 athletes but normalized within 48 hours in 17 (94%) athletes. Interestingly, elevation of hsTnT was not related to age, sex, training status, the cardiovascular risk profile or the presence of cardiac arrhythmias during the race, but was related to exercise-induced ST-segment deviation ( $p < 0.0001$ ) and inversely correlated with the hematocrit (measured immediately after the race).

Cardiac magnetic resonance imaging (MRI) is now the gold standard for detecting myocardial damage [30] and myocardial edema as well as decreased ventricular function after a marathon race [31,32]. We were not able to demonstrate late gadolinium enhancement as an indicator of permanent myocardial fibrosis in ten experienced recreational athletes with ST-segment deviation or detected cardiac arrhythmia. This is in line with a previous study reporting no

Herm et al., ECG changes during a marathon race

late gadolinium enhancement in 20 recreational athletes within 48 hours after a marathon race [31]. Interestingly, a transient cardiac edema was reported in 17 (85%) out of 20 marathon runners [31], but no correlation was reported between biomarkers and cardiac edema. We are, however, unable to exclude a transient cardiac edema in marathon runners because cardiac MRI was performed within 10-42 days after the marathon race.

Taken together, vigorous exercise can go along with transient troponin elevation, ST-segment alterations or nsVT in a fit and active population. However, athletes with ST-segment deviation or nsVT during the race did not report a cardiovascular event within one year afterwards. Thus, these findings are likely to be benign, but it was still recommended to rule out structural heart disease or obstructive coronary artery disease in these athletes. Our results strengthen the assumption that hsTnT elevation originates from the heart and not primarily from non-cardiac sources [8]. However, we are unable to draw final conclusions. Whether borderline cardiac damage by repetitive strenuous exercise could lead to permanent (potentially arrhythmogenic) cardiac remodeling is under debate [6,33].

Focusing primarily on the feasibility of portable ECG monitoring and detection of ECG changes during the race, major limitations of the observational “Berlin Beat of Running” study are the missing (serial) echocardiography or cardiac stress MRI, thus limiting the clinical significance of the observed ST-segment changes and elevated hsTnT levels. Furthermore, a normal cardiac MRI within days after the race does not completely rule out (transient) exercise-induced cardiac damage [34]. Since only one fourth of all athletes were female and because of a potential selection bias during enrolment, the generalizability of our results is limited. Moreover, due to the limited number of endpoints observed, we believe that

Herm et al., ECG changes during a marathon race

the results of the multivariate analysis should be interpreted with caution. Combining nsVT and ST-segment deviations for statistical analysis may have introduced an information bias. Unfortunately, it was impossible to assess the mean duration of ST-segment deviation in more detail, as ST-segment changes were present intermittently. Finally, exercise capacity testing would have allowed more accurate evaluation of training status.

### **Conclusion**

ECG recording during a marathon race is feasible, which may be helpful in the diagnostic work-up of selected athletes. Cardiac arrhythmias or exercise-induced ST-segment deviations appear in a relevant subset of experienced recreational athletes during a marathon race and predominantly in older athletes. Marathon-induced ST-segment deviations were associated with elevated hsTnT values immediately after the race. Cardiac MRI detected no myocardial fibrosis by late gadolinium enhancement in a subset of these athletes.

Herm et al., ECG changes during a marathon race

### List of abbreviations

atrial fibrillation, AF; AV, atrio-ventricular; CK, creatine kinase; CK-MB, myocardium- and brain-specific CK; electrocardiogram, ECG; hsTnT, high-sensitive troponin T; magnetic resonance imaging, MRI; SVT, supraventricular tachycardia; Tesla, T; non-sustainable ventricular tachycardia, nsVT.

### Funding

The investigator-initiated “Berlin Beat of Running” study was supported by the SCC EVENTS GmbH, Berlin. Bayer Healthcare (Leverkusen, Germany) and Sanofi-Aventis Deutschland GmbH (Berlin, Germany) supported the study with an unrestricted grant. The GETEMED AG (Teltow, Germany) provided the ECG-recorders and comprehensive technical support. KGH, JH, CK, JBF, ME and GJJ received funding from the Federal Ministry of Education and Research via the grant Center for Stroke Research Berlin (01 EO 0801). ME received support from the Volkswagen-Stiftung, Deutsche Forschungsgemeinschaft and the EU.

### Acknowledgement

The results of the present study are presented clearly, honestly and without fabrication, falsification or inappropriate data manipulation, and we state that results of the present study do not constitute endorsement by ACSM. We appreciate the work of the organizing SCC EVENTS GmbH who supported the “Berlin Beat of Running” study in an outstanding manner. We would like to thank all members of the “Berlin Beat of Running” study team [23]

Herm et al., ECG changes during a marathon race

and all athletes for their participation. In addition, we thank Catherine Aubel (CSB) and Julia Herde (CSB) for critically reviewing the manuscript.

### **Competing interests**

JH reports no conflict of interest. AT reports lecture fees from the Circle Institute. MK received consulting, lecture and advisory board fees from ALK, Berlin Chemie, Novartis, Mundipharma and Teva. LB reports research support from the German Ministry of Research and Education. JBF reports the following board memberships, consultancies and/or payments for lectures including service on speaker's bureaus: Boehringer-Ingelheim, Lundbeck, BioClinica and Parexel. PUH reports research grants from the German Ministry of Research and Education, EU, Charité, Berlin Chamber of Physicians, German Parkinson Society, University Hospital Würzburg, Robert-Koch-Institute, Charité–Universitätsmedizin Berlin (within MonDAFIS; MonDAFIS is supported by an unrestricted research grant to the Charité from Bayer Healthcare), University Göttingen (within FIND-AF<sub>randomized</sub>; FIND-AF<sub>randomized</sub> is supported by an unrestricted research grant to the University Göttingen from Boehringer-Ingelheim), and University Hospital Heidelberg (within RASUNOA-prime; RASUNOA-prime is supported by an unrestricted research grant to the University Hospital Heidelberg from Bayer Healthcare, BMS, Boehringer-Ingelheim), outside submitted work. GJJ has received funding from the German Ministry for Education and Research. He has served on the Critical Event committees of the SourceXT registry and the ProTAVI-C-study (Edwards Lifesciences, USA). He serves as a consultant for Cipio Partners (Munich, Germany and Elron, Tel Aviv, Israel). He has received speakers' honoraria from Genzyme and Pfizer

1  
2  
3  
4  
5  
6  
7 Herm et al., ECG changes during a marathon race  
8  
9

10  
11 (2010-2013). ME and KGH report lecture fees and study grants from Sanofi-Aventis and  
12  
13 Bayer Healthcare.  
14

### 15 16 17 18 **Contributorship statement** 19

20 JH has made substantial contributions to acquisition, analysis and interpretation of data and  
21 drafted the manuscript. AT and AW have made substantial contributions to data analysis and  
22 interpretation of data. CK has made substantial contributions to design and acquisition of  
23 data. MK, LB, JL, JBF, WH and ME revised the manuscript critically for important  
24 intellectual content. PUH has made substantial contributions to analysis and interpretation of  
25 data and revised the manuscript critically for important intellectual content. GJJ has made  
26 substantial contributions to conception and design and revised the manuscript critically for  
27 important intellectual content. KGH has made substantial contributions to conception and  
28 design, analysis and interpretation of data and drafted the manuscript.  
29  
30  
31  
32  
33  
34  
35  
36  
37  
38  
39  
40  
41

### 42 **Data Sharing Statement** 43

44 There are no additional data available for this study.  
45  
46  
47  
48  
49  
50  
51  
52  
53  
54  
55  
56  
57  
58  
59  
60

Herm et al., ECG changes during a marathon race

## References

- 1 Chakravarty EF, Hubert HB, Lingala VB, *et al.* Reduced disability and mortality among aging runners: a 21-year longitudinal study. *Arch Intern Med* 2008;**168**:1638–46. doi:10.1001/archinte.168.15.1638
- 2 Soares-Miranda L, Siscovick DS, Psaty BM, *et al.* Physical Activity and Risk of Coronary Heart Disease and Stroke in Older Adults. *Circulation* 2016;**133**:147–55. doi:10.1161/CIRCULATIONAHA.115.018323
- 3 Mittleman MA, Maclure M, Tofler GH, *et al.* Triggering of acute myocardial infarction by heavy physical exertion. Protection against triggering by regular exertion. Determinants of Myocardial Infarction Onset Study Investigators. *N Engl J Med* 1993;**329**:1677–83. doi:10.1056/NEJM199312023292301
- 4 Winzer BM, Whiteman DC, Reeves MM, *et al.* Physical activity and cancer prevention: a systematic review of clinical trials. *Cancer Causes Control* 2011;**22**:811–26. doi:10.1007/s10552-011-9761-4
- 5 Carek PJ, Laibstain SE, Carek SM. Exercise for the treatment of depression and anxiety. *Int J Psychiatry Med* 2011;**41**:15–28. <http://www.ncbi.nlm.nih.gov/pubmed/21495519> (accessed 23 Nov 2011).
- 6 La\_Gerche A, Heidbuchel H. Can intensive exercise harm the heart? You can get too much of a good thing. *Circulation* 2014;**130**:992–1002. doi:10.1161/CIRCULATIONAHA.114.008141



Herm et al., ECG changes during a marathon race

- 1  
2  
3  
4  
5  
6  
7  
8  
9  
10  
11 7 Kim JH, Malhotra R, Chiampas G, *et al.* Cardiac arrest during long-distance running  
12 races. *N Engl J Med* 2012;**366**:130–40. doi:10.1056/NEJMoa1106468  
13  
14  
15  
16 8 Albano AJ, Thompson PD, Kapur NK. Acute coronary thrombosis in Boston marathon  
17 runners. *N Engl J Med* 2012;**366**:184–5. doi:10.1056/NEJMc1111015  
18  
19  
20  
21 9 Gerardin B, Collet J-P, Mustafic H, *et al.* Registry on acute cardiovascular events  
22 during endurance running races: the prospective RACE Paris registry. *Eur Hear J*  
23 2016;**37**:2531–41. doi:10.1093/eurheartj/ehv675  
24  
25  
26  
27  
28  
29 10 Eijsvogels TMH, Hoogerwerf MD, Maessen MFH, *et al.* Predictors of cardiac troponin  
30 release after a marathon. *J Sci Med Sport* 2014;**18**:88–92.  
31  
32  
33  
34  
35  
36  
37 11 Mehta R, Gaze D, Mohan S, *et al.* Post-exercise cardiac troponin release is related to  
38 exercise training history. *Int J Sport Med* 2012;**33**:333–7. doi:10.1055/s-0031-1301322  
39  
40  
41  
42 12 Fortescue EB, Shin AY, Greenes DS, *et al.* Cardiac troponin increases among runners  
43 in the Boston Marathon. *Ann Emerg Med* 2007;**49**:137–43, 143.e1.  
44  
45  
46  
47  
48  
49 13 O’Keefe JH, Patil HR, Lavie CJ, *et al.* Potential adverse cardiovascular effects from  
50 excessive endurance exercise. *Mayo Clin Proc* 2012;**87**:587–95.  
51  
52  
53  
54  
55  
56  
57 14 Heidbüchel H, Hoogsteen J, Fagard R, *et al.* High prevalence of right ventricular  
58 involvement in endurance athletes with ventricular arrhythmias. Role of an  
59  
60

Herm et al., ECG changes during a marathon race

- 1  
2  
3  
4  
5  
6  
7  
8  
9  
10  
11  
12  
13  
14  
15  
16  
17  
18  
19  
20  
21  
22  
23  
24  
25  
26  
27  
28  
29  
30  
31  
32  
33  
34  
35  
36  
37  
38  
39  
40  
41  
42  
43  
44  
45  
46  
47  
48  
49  
50  
51  
52  
53  
54  
55  
56  
57  
58  
59  
60
- electrophysiologic study in risk stratification. *Eur Hear J* 2003;**24**:1473–80.<http://www.ncbi.nlm.nih.gov/pubmed/12919770> (accessed 5 Aug 2014).
- 15 Harper RW, Mottram PM. Exercise-induced right ventricular dysplasia/cardiomyopathy--an emerging condition distinct from arrhythmogenic right ventricular dysplasia/cardiomyopathy. *Hear Lung Circ* 2009;**18**:233–5. doi:10.1016/j.hlc.2008.01.005
- 16 Abdulla J, Nielsen JR. Is the risk of atrial fibrillation higher in athletes than in the general population? A systematic review and meta-analysis. *Europace* 2009;**11**:1156–9. doi:10.1093/europace/eup197
- 17 Andersen K, Farahmand B, Ahlbom A, *et al.* Risk of arrhythmias in 52 755 long-distance cross-country skiers: a cohort study. *Eur Hear J* 2013;**34**:3624–31. doi:10.1093/eurheartj/eh188
- 18 Pedersen CT, Kay GN, Kalman J, *et al.* EHRA/HRS/APHRS expert consensus on ventricular arrhythmias. *Europace* 2014;**16**:1257–83. doi:10.1093/europace/euu194
- 19 Grabs V, Peres T, Zelger O, *et al.* Decreased prevalence of cardiac arrhythmias during and after vigorous and prolonged exercise in healthy male marathon runners. *Am Hear J* 2015;**170**:149–55. doi:10.1016/j.ahj.2015.04.001
- 20 Luurila OJ, Karjalainen J, Viitasalo M, *et al.* Arrhythmias and ST segment deviation during prolonged exhaustive exercise (ski marathon) in healthy middle-aged men. *Eur Hear J* 1994;**15**:507–13.<http://www.ncbi.nlm.nih.gov/pubmed/8070478> (accessed 23

1  
2  
3  
4  
5  
6  
7 Herm et al., ECG changes during a marathon race  
8  
9

10  
11 Nov 2011).  
12

- 13  
14 21 Franco V, Callaway C, Salcido D, *et al.* Characterization of electrocardiogram changes  
15 throughout a marathon. *Eur J Appl Physiol* 2014;**114**:1725–35. doi:10.1007/s00421-  
16 014-2898-6  
17  
18  
19  
20  
21 22 Aagaard P, Sahlén A, Bergfeldt L, *et al.* Heart rate and its variability in response to  
22 running-associations with troponin. *Med Sci Sport Exerc* 2014;**46**:1624–30.  
23 doi:10.1249/MSS.0000000000000270  
24  
25  
26  
27  
28  
29 23 Haeusler KG, Herm J, Kunze C, *et al.* Rate of cardiac arrhythmias and silent brain  
30 lesions in experienced marathon runners: rationale, design and baseline data of the  
31 Berlin Beat of Running study. *BMC Cardiovasc Disord* 2012;**12**:69. doi:10.1186/1471-  
32 2261-12-69  
33  
34  
35  
36  
37  
38  
39 24 Carr JC, Simonetti O, Bundy J, *et al.* Cine MR angiography of the heart with  
40 segmented true fast imaging with steady-state precession. *Radiology* 2001;**219**:828–  
41 34.<http://www.ncbi.nlm.nih.gov/pubmed/11376278> (accessed 23 Nov 2011).  
42  
43  
44  
45  
46 25 Simonetti OP, Kim RJ, Fieno DS, *et al.* An improved MR imaging technique for the  
47 visualization of myocardial infarction. *Radiology* 2001;**218**:215–  
48 23.<http://www.ncbi.nlm.nih.gov/pubmed/11152805> (accessed 23 Oct 2011).  
49  
50  
51  
52  
53  
54 26 Drezner JA, Ackerman MJ, Anderson J, *et al.* Electrocardiographic interpretation in  
55 athletes: the ‘Seattle criteria’. *Br J Sport Med* 2013;**47**:122–4. doi:10.1136/bjsports-  
56 2012-092067  
57  
58  
59  
60

Herm et al., ECG changes during a marathon race

- 1  
2  
3  
4  
5  
6  
7  
8  
9  
10  
11 27 Gramatikov B, Iyer V. Intra-QRS spectral changes accompany ST segment changes  
12 during episodes of myocardial ischemia. *J electrocardiol* 2015;**48**:115–22.  
13 doi:10.1016/j.jelectrocard.2014.09.005  
14  
15  
16  
17  
18 28 Spethmann S, Prescher S, Dreger H, *et al.* Electrocardiographic monitoring during  
19 marathon running: a proof of feasibility for a new telemedical approach. *Eur J Prev*  
20 *Cardiol* 2014;**21**:32–7. doi:10.1177/2047487314553736  
21  
22  
23  
24  
25  
26 29 George K, Whyte G, Stephenson C, *et al.* Postexercise left ventricular function and  
27 cTnT in recreational marathon runners. *Med Sci Sport Exerc* 2004;**36**:1709–  
28 15.<http://www.ncbi.nlm.nih.gov/pubmed/15595291> (accessed 14 Jul 2015).  
29  
30  
31  
32  
33 30 Utomi V, Oxborough D, Whyte GP, *et al.* Systematic review and meta-analysis of  
34 training mode, imaging modality and body size influences on the morphology and  
35 function of the male athlete’s heart. *Heart* 2013;**99**:1727–33. doi:10.1136/heartjnl-  
36 2012-303465  
37  
38  
39  
40  
41  
42  
43 31 Gaudreault V, Tizon-Marcos H, Poirier P, *et al.* Transient myocardial tissue and  
44 function changes during a marathon in less fit marathon runners. *Can J Cardiol*  
45 2013;**29**:1269–76. doi:10.1016/j.cjca.2013.04.022  
46  
47  
48  
49  
50  
51 32 Karlstedt E, Chelvanathan A, Da Silva M, *et al.* The impact of repeated marathon  
52 running on cardiovascular function in the aging population. *J Cardiovasc Magn Reson*  
53 2012;**14**:58. doi:10.1186/1532-429X-14-58  
54  
55  
56  
57  
58 33 Wilson M, O’Hanlon R, Prasad S, *et al.* Diverse patterns of myocardial fibrosis in  
59  
60

1  
2  
3  
4  
5  
6  
7 Herm et al., ECG changes during a marathon race  
8  
9

10  
11 lifelong, veteran endurance athletes. *J Appl Physiol* 2011;**110**:1622–6.

12  
13 doi:10.1152/jappphysiol.01280.2010  
14

- 15  
16 34 La Gerche A, Burns AT, Mooney DJ, *et al.* Exercise-induced right ventricular  
17  
18 dysfunction and structural remodelling in endurance athletes. *Eur Hear J* 2012;**33**:998–  
19  
20 1006. doi:10.1093/eurheartj/ehr397  
21  
22  
23  
24  
25  
26  
27  
28  
29  
30  
31  
32  
33  
34  
35  
36  
37  
38  
39  
40  
41  
42  
43  
44  
45  
46  
47  
48  
49  
50  
51  
52  
53  
54  
55  
56  
57  
58  
59  
60

Herm et al., ECG changes during a marathon race

**Table 1:** Baseline characteristics of the 107 participants of the “Berlin Beat of Running” study who finished the marathon and who had evaluable ECG data.

|                                                   |                  |
|---------------------------------------------------|------------------|
| Age; mean; years; median [IQR]                    | 48 [45-53]       |
| Female gender; % (n)                              | 24.3 (26)        |
| Body mass index; kg/m <sup>2</sup> ; median [IQR] | 23.4 [21.6-24.7] |
| Hypertension; % (n)                               | 8.4 (9)          |
| Diabetes mellitus; % (n)                          | 0 (0)            |
| Heart failure; % (n)                              | 0 (0)            |
| Coronary artery disease; % (n)                    | 0 (0)            |
| Hyperlipidemia; % (n)                             | 2.8 (3)          |
| Current smoking; % (n)                            | 6.5 (7)          |
| Medication at enrolment                           |                  |
| Antiplatelet; % (n)                               | 0.9 (1)          |
| Oral anticoagulant; % (n)                         | 0                |
| Beta-blocker; % (n)                               | 1.9 (2)          |
| Statin; % (n)                                     | 1.9 (2)          |
| Antihypertensive; % (n)                           | 6.5 (7)          |

Herm et al., ECG changes during a marathon race

**Table 2:** Cardiovascular risk profile and training status of recreational athletes with or without abnormal ECG findings, respectively. ST segment deviation, atrio- or ventricular arrhythmias (atrio-ventricular block grade IIb or III, triplets, non-sustained ventricular tachycardia, supraventricular tachycardia) or atrial fibrillation were regarded as abnormal findings.

|                                                | <b>Normal<br/>ECG<br/>n=89</b> | <b>Abnormal<br/>ECG<br/>n=18</b> | <b>Univariate<br/>Analysis<br/>p-value *</b> | <b>Multivariate<br/>Analysis<br/>OR (95%CI)</b> |
|------------------------------------------------|--------------------------------|----------------------------------|----------------------------------------------|-------------------------------------------------|
| Age; years; median [IQR]                       | 48 [44-50]                     | 54 [48-59]                       | 0.004                                        | 1.11 (1.01-1.23)                                |
| Female gender, % (n)                           | 24.7 (22)                      | 22.2 (4)                         | 0.822                                        |                                                 |
| <b>Physical activity</b>                       |                                |                                  |                                              |                                                 |
| Marathon runs ≤ 5 years; median [IQR]          | 5 [4 -10]                      | 6 [4-7]                          | 0.923                                        |                                                 |
| Marathon runs total; n; median [IQR]           | 9 [5-18]                       | 7 [6-14]                         | 0.573                                        |                                                 |
| Current running; km/week; median [IQR]         | 65 [50-80]                     | 58 [50-70]                       | 0.151                                        |                                                 |
| Regular running; km/ week; median [IQR]        | 40 [30-50]                     | 40 [30-50]                       | 0.409                                        |                                                 |
| Present marathon time; min; median [IQR]       | 238 [215-268]                  | 275 [229-326]                    | 0.009                                        | 1.44 (0.98-2.12)                                |
| Hematocrit post-race; %; median [IQR]          | 0.44 [0.41-0.45]               | 0.43 [0.41-0.45]                 | 0.711                                        |                                                 |
| Body Mass Index; kg/m <sup>2</sup> ; mean ± SD | 23.2±2.2                       | 23.6±1.9                         | 0.449                                        |                                                 |
| <b>Comorbidities</b>                           |                                |                                  |                                              |                                                 |
| Hypertension; % (n)                            | 6.7 (6)                        | 16.7 (3)                         | 0.166                                        |                                                 |

Herm et al., ECG changes during a marathon race

|                        |         |          |       |
|------------------------|---------|----------|-------|
| Hyperlipidaemia; % (n) | 2.2 (2) | 2.8 (3)  | 0.438 |
| Current smoking; % (n) | 5.6 (5) | 11.1 (2) | 0.390 |

*Values are expressed in % (n), mean  $\pm$  SD or median [IQR] as appropriate; \* p-value calculated by  $\chi^2$ -test or Mann-Whitney U test, as appropriate. Multivariate analysis was calculated in a binary logistic regression model using backwards selection.*



**Table 3:** Troponin T elevation post-marathon in the 107 athletes who finished the marathon race and who had evaluable ECG data.

|                                                   | <b>Troponin<br/>T<br/>&lt; 50 ng/L<br/>n=89</b> | <b>Troponin<br/>T<br/>≥ 50 ng/L<br/>n=18</b> | <b>Univariate<br/>Analysis<br/>p-value *</b> | <b>Multivariate<br/>Analysis<br/>OR (95%CI)</b> |
|---------------------------------------------------|-------------------------------------------------|----------------------------------------------|----------------------------------------------|-------------------------------------------------|
| Age; years; median [IQR]                          | 48 [45-52]                                      | 49 [45-53]                                   | 0.605                                        |                                                 |
| Female gender; % (n)                              | 21.3 (19)                                       | 38.9 (7)                                     | 0.114                                        |                                                 |
| Body mass index; kg/m <sup>2</sup> ;<br>mean ± SD | 23 [22-25]                                      | 23 [22-25]                                   | 0.723                                        |                                                 |
| Present marathon time; min;<br>median [IQR]       | 236<br>[217-269]                                | 268<br>[237-309]                             | 0.040                                        | 1.25<br>(0.83 – 1.87)                           |
| Marathon runs ≤ 5 y; n;<br>median [IQR]           | 6 [4-10]                                        | 5 [3-8]                                      | 0.327                                        |                                                 |
| Marathon runs total; n;<br>median [IQR]           | 9 [6-18]                                        | 7 [5-12]                                     | 0.147                                        |                                                 |
| Regular weekly running;<br>km; median [IQR]       | 40 [30-50]                                      | 40 [30-50]                                   | 0.791                                        |                                                 |
| Coexisting hypertension; %<br>(n)                 | 9.0 (8)                                         | 5.6 (1)                                      | 0.632                                        |                                                 |
| Hyperlipidaemia; % (n)                            | 3.4 (3)                                         | 0 (0)                                        | 0.429                                        |                                                 |
| ST-segment deviation; %<br>(n)                    | 3.4 (3)                                         | 27.8 (5)                                     | <0.0001                                      | 9.9<br>(1.90 – 51.5)                            |
| Arrhythmias; % (n)                                | 11.2 (10)                                       | 5.6 (1)                                      | 0.469                                        |                                                 |
| Troponin pre-race; µg/L;<br>median [IQR]          | 0.012<br>[0.012-<br>0.012]                      | 0.012<br>[0.012-<br>0.012]                   | 0.131                                        |                                                 |
| Creatinine pre-race; mg/dL;<br>median [IQR]       | 0.86<br>[0.81-0.96]                             | 0.85<br>[0.77-0.97]                          | 0.761                                        |                                                 |
| Creatinine post-race;<br>mg/dL; median [IQR]      | 1.27<br>[1.11-1.46]                             | 1.34<br>[1.17-1.48]                          | 0.424                                        |                                                 |
| CK post-race; U/L; median<br>[IQR]                | 333<br>[250-412]                                | 350<br>[291-611]                             | 0.263                                        |                                                 |

Herm et al., ECG changes during a marathon race

|                                          |                   |             |       |                              |
|------------------------------------------|-------------------|-------------|-------|------------------------------|
| CK-MB post-race; U/L;<br>median [IQR]    | 35 [28-41]        | 33 [29-52]  | 0.609 |                              |
| Hematocrit post-race; %;<br>median [IQR] | <u>44 [42-46]</u> | 41 [39-44]) | 0.003 | <u>0.76</u><br>(0.62 – 0.92) |

*Values are expressed in % (n), mean ± SD or median [IQR] as appropriate; \* p-value calculated by  $\chi^2$  – test or Mann-Whitney U test, as appropriate. Multivariate analysis was calculated in a binary logistic regression model using backwards selection.*

**Figure 1:** Non-sustained ventricular tachycardia in a well-trained 48-year old male endurance runner without cardiovascular risk factors despite smoking.

**Figure 2:** ECG at rest (A) and exercise-induced ST segment deviations (B) in a 60-year old male endurance runner without cardiovascular risk.



Figure 1: Non-sustained ventricular tachycardia in a well-trained 48-year old male endurance runner without cardiovascular risk factors despite smoking.

297x151mm (300 x 300 DPI)

review only

1  
2  
3  
4  
5  
6  
7  
8  
9  
10  
11  
12  
13  
14  
15  
16  
17  
18  
19  
20  
21  
22  
23  
24  
25  
26  
27  
28  
29  
30  
31  
32  
33  
34  
35  
36  
37  
38  
39  
40  
41  
42  
43  
44  
45  
46  
47  
48  
49  
50  
51  
52  
53  
54  
55  
56  
57  
58  
59  
60

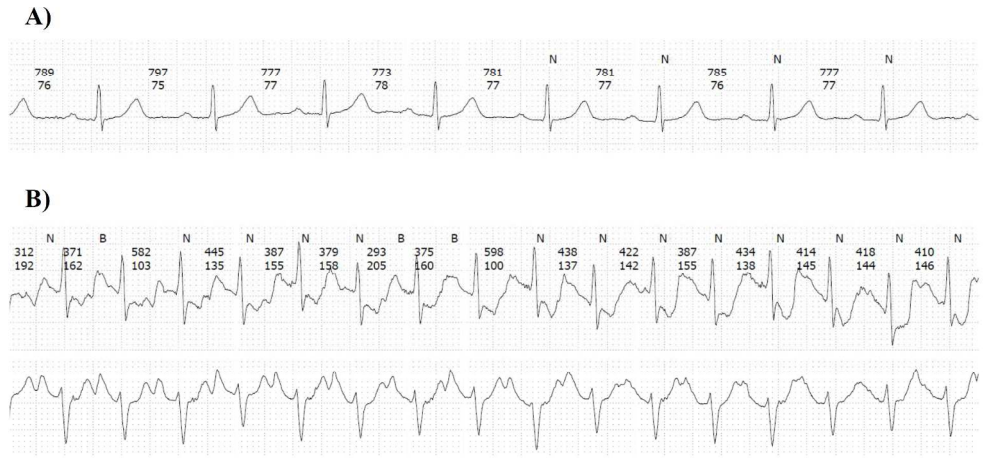

Figure 2: ECG at rest (A) and exercise-induced ST segment deviations (B) in a 60-year old male endurance runner without cardiovascular risk.

301x149mm (300 x 300 DPI)

**ONLINE SUPPLEMENT** High-sensitive troponin T (hsTnT) values returned to normal within up to 58 hours after the marathon race in almost all athletes (95%). Creatine kinase (CK) remains elevated in all 21 athletes (with ST-segment deviation and/or hsTnT elevation).

**Table ONLINE SUPPLEMENT:** Characteristics of 21 athletes with either ST-segment deviation (>1 mm) and hsTnT elevation ( $\geq 50$  ng/L) (n=5), ST-segment deviation (n=3) or hsTnT elevation (n=13). Pathological findings are labeled in bold.

| Age | Sex    | Medication       | Cardiovascular risk factors | NSVT <sup>§</sup> | ST-segment deviation | hsTnT <sup>§</sup> ng/L* | hsTnT ng/L** | CK-MB mg/dL* | CK-MB mg/dL** | CK mg/dL* | CK mg/dL** | Cardiac MRI |
|-----|--------|------------------|-----------------------------|-------------------|----------------------|--------------------------|--------------|--------------|---------------|-----------|------------|-------------|
| 45  | Female | None             | No                          | No                | <b>Yes</b>           | <b>91</b>                | 19           | 21           | 32            | 877       | 1194       | Yes         |
| 45  | Female | L-Thyroxin       | No                          | No                | <b>Yes</b>           | <b>71</b>                | 12           | 18           | 16            | 243       | 235        | Yes         |
| 53  | Male   | None             | No                          | No                | <b>Yes</b>           | <b>63</b>                | 14           | 14           | 35            | 893       | 2121       | Yes         |
| 59  | Male   | None             | No                          | No                | <b>Yes</b>           | <b>66</b>                | 12           | 19           | 54            | 406       | 2236       | Yes         |
| 60  | Male   | None             | Smoker                      | <b>Yes</b>        | <b>Yes</b>           | <b>70</b>                | 12           | 27           | 72            | 2867      | 3625       | Yes         |
| 48  | Male   | None             | No                          | No                | <b>Yes</b>           | <b>32</b>                | 16           | 18           | 44            | 381       | 1719       | No          |
| 55  | Male   | None             | No                          | No                | <b>Yes</b>           | <b>21</b>                | 12           | 21           | 35            | 201       | 489        | No          |
| 60  | Male   | Antihypertensive | Hypertension                | No                | <b>Yes</b>           | <b>27</b>                | 13           | 28           | 44            | 767       | 1979       | No          |
| 44  | Female | None             | Smoker                      | No                | No                   | <b>78</b>                | 12           | 26           | 20            | 306       | 192        | Yes         |
| 48  | Male   | None             | No                          | No                | No                   | <b>138</b>               | 20           | 59           | 67            | 325       | 2186       | Yes         |
| 49  | Female | None             | No                          | No                | No                   | <b>63</b>                | 12           | 22           | 41            | 205       | 1357       | Yes         |
| 50  | Male   | None             | No                          | No                | No                   | <b>87</b>                | 29           | 30           | 73            | 360       | 3462       | Yes         |
| 60  | Female | None             | No                          | No                | No                   | <b>216</b>               | 64           | 33           | 14            | 455       | 169        | Yes         |
| 39  | Male   | None             | No                          | No                | No                   | <b>59</b>                | 23           | 47           | 87            | 583       | 2756       | No          |
| 40  | Female | None             | No                          | No                | No                   | <b>85</b>                | 12           | 42           | 33            | 696       | 914        | No          |
| 45  | Male   | None             | No                          | No                | No                   | <b>83</b>                | 29           | 175          | 157           | 195       | 605        | No          |
| 47  | Male   | None             | No                          | No                | No                   | <b>52</b>                | 12           | 37           | 42            | 309       | 1983       | No          |
| 48  | Male   | None             | No                          | No                | No                   | <b>64</b>                | 12           | 52           | 101           | 405       | 4604       | No          |
| 50  | Female | Antihypertensive | Hypertension                | No                | No                   | <b>50</b>                | 12           | 29           | 28            | 315       | 485        | No          |
| 53  | Female | None             | No                          | No                | No                   | <b>62</b>                | 12           | 30           | 24            | 339       | 448        | No          |
| 54  | Male   | None             | No                          | No                | No                   | <b>67</b>                | 15           | 33           | 23            | 234       | 409        | No          |

<sup>§</sup> non-sustained ventricular tachycardia; <sup>§</sup> high-sensitive Troponin T; \* within 30 minutes post-race; \*\* up to 58 hours after the race

## STROBE Statement—checklist of items that should be included in reports of observational studies

|                          | Item No | page                     | Recommendation                                                                                                                                                                             |
|--------------------------|---------|--------------------------|--------------------------------------------------------------------------------------------------------------------------------------------------------------------------------------------|
| Title and abstract       | 1       | 2                        | (a) Indicate the study's design with a commonly used term in the title or the abstract                                                                                                     |
|                          |         | 2                        | (b) Provide in the abstract an informative and balanced summary of what was done and what was found                                                                                        |
| <b>Introduction</b>      |         |                          |                                                                                                                                                                                            |
| Background/rationale     | 2       | 3                        | Explain the scientific background and rationale for the investigation being reported                                                                                                       |
| Objectives               | 3       | 4                        | State specific objectives, including any prespecified hypotheses                                                                                                                           |
| <b>Methods</b>           |         |                          |                                                                                                                                                                                            |
| Study design             | 4       | 4                        | Present key elements of study design early in the paper                                                                                                                                    |
| Setting                  | 5       | 4                        | Describe the setting, locations, and relevant dates, including periods of recruitment, exposure, follow-up, and data collection                                                            |
| Participants             | 6       | 4                        | (a) <i>Cohort study</i> —Give the eligibility criteria, and the sources and methods of selection of participants. Describe methods of follow-up                                            |
|                          |         |                          | <i>Case-control study</i> —Give the eligibility criteria, and the sources and methods of case ascertainment and control selection. Give the rationale for the choice of cases and controls |
|                          |         |                          | <i>Cross-sectional study</i> —Give the eligibility criteria, and the sources and methods of selection of participants                                                                      |
| Variables                | 7       | 7                        | (b) <i>Cohort study</i> —For matched studies, give matching criteria and number of exposed and unexposed                                                                                   |
|                          |         |                          | <i>Case-control study</i> —For matched studies, give matching criteria and the number of controls per case                                                                                 |
| Data sources/measurement | 8*      | 5-6                      | Clearly define all outcomes, exposures, predictors, potential confounders, and effect modifiers. Give diagnostic criteria, if applicable                                                   |
| Bias                     | 9       | 13                       | For each variable of interest, give sources of data and details of methods of assessment (measurement). Describe comparability of assessment methods if there is more than one group       |
| Study size               | 10      | 4 (Ref. to design paper) | Describe any efforts to address potential sources of bias                                                                                                                                  |
| Quantitative variables   | 11      | 7                        | Explain how the study size was arrived at                                                                                                                                                  |
| Statistical methods      | 12      | 7                        | Explain how quantitative variables were handled in the analyses. If applicable, describe which groupings were chosen and why                                                               |
|                          |         |                          | (a) Describe all statistical methods, including those used to control for confounding                                                                                                      |
|                          |         |                          | (b) Describe any methods used to examine subgroups and interactions                                                                                                                        |
|                          |         |                          | (c) Explain how missing data were addressed                                                                                                                                                |
|                          | n.a.    |                          | (d) <i>Cohort study</i> —If applicable, explain how loss to follow-up was addressed                                                                                                        |
|                          | n.a.    |                          | <i>Case-control study</i> —If applicable, explain how matching of cases and controls was addressed                                                                                         |

*Cross-sectional study*—If applicable, describe analytical methods taking account of sampling strategy

n.a. (g) Describe any sensitivity analyses

Continued on next page

| <b>Results</b>           |     | <b>page</b>                                                                                                                                                                                                  |         |
|--------------------------|-----|--------------------------------------------------------------------------------------------------------------------------------------------------------------------------------------------------------------|---------|
| Participants             | 13* | (a) Report numbers of individuals at each stage of study—eg numbers potentially eligible, examined for eligibility, confirmed eligible, included in the study, completing follow-up, and analysed            | 8       |
|                          |     | (b) Give reasons for non-participation at each stage                                                                                                                                                         | 8       |
|                          |     | (c) Consider use of a flow diagram                                                                                                                                                                           | n.a.    |
| Descriptive data         | 14* | (a) Give characteristics of study participants (eg demographic, clinical, social) and information on exposures and potential confounders                                                                     | Table 1 |
|                          |     | (b) Indicate number of participants with missing data for each variable of interest                                                                                                                          | n.a.    |
|                          |     | (c) <i>Cohort study</i> —Summarise follow-up time (eg, average and total amount)                                                                                                                             |         |
| Outcome data             | 15* | <i>Cohort study</i> —Report numbers of outcome events or summary measures over time                                                                                                                          | 7-10    |
|                          |     | <i>Case-control study</i> —Report numbers in each exposure category, or summary measures of exposure                                                                                                         |         |
|                          |     | <i>Cross-sectional study</i> —Report numbers of outcome events or summary measures                                                                                                                           |         |
| Main results             | 16  | (a) Give unadjusted estimates and, if applicable, confounder-adjusted estimates and their precision (eg, 95% confidence interval). Make clear which confounders were adjusted for and why they were included | 7-10    |
|                          |     | (b) Report category boundaries when continuous variables were categorized                                                                                                                                    | 7-10    |
|                          |     | (c) If relevant, consider translating estimates of relative risk into absolute risk for a meaningful time period                                                                                             | n.a.    |
| Other analyses           | 17  | Report other analyses done—eg analyses of subgroups and interactions, and sensitivity analyses                                                                                                               | n.a.    |
| <b>Discussion</b>        |     |                                                                                                                                                                                                              |         |
| Key results              | 18  | Summarise key results with reference to study objectives                                                                                                                                                     | 11      |
| Limitations              | 19  | Discuss limitations of the study, taking into account sources of potential bias or imprecision. Discuss both direction and magnitude of any potential bias                                                   | 13      |
| Interpretation           | 20  | Give a cautious overall interpretation of results considering objectives, limitations, multiplicity of analyses, results from similar studies, and other relevant evidence                                   | 12      |
| Generalisability         | 21  | Discuss the generalisability (external validity) of the study results                                                                                                                                        | 13      |
| <b>Other information</b> |     |                                                                                                                                                                                                              |         |
| Funding                  | 22  | Give the source of funding and the role of the funders for the present study and, if applicable, for the original study on which the present article is based                                                | 14      |

\*Give information separately for cases and controls in case-control studies and, if applicable, for exposed and unexposed groups in cohort and cross-sectional studies.

**Note:** An Explanation and Elaboration article discusses each checklist item and gives methodological background and published examples of transparent reporting. The STROBE checklist is best used in conjunction with this article (freely available on the Web sites of PLoS Medicine at <http://www.plosmedicine.org/>, Annals of Internal Medicine at <http://www.annals.org/>, and Epidemiology at <http://www.epidem.com/>). Information on the STROBE Initiative is available at [www.strobe-statement.org](http://www.strobe-statement.org).
