# Supplementary material for: Frequency of exercise-induced ST-T-segment deviations and cardiac arrhythmias in recreational endurance athletes during a marathon race: results of the prospective observational Berlin Beat of Running study
Source: PubMed Central journal article supplement — BMJ Open. 2017 Aug 3;7(8):e015798. doi: 10.1136/bmjopen-2016-015798 (PMC5629744; doi:10.1136/bmjopen-2016-015798), 2017-08-03
Supplement: bmjopen-2016-015798supp001.pdf [file bmjopen-2016-015798supp001.pdf]

**ONLINE SUPPLEMENT** High-sensitive troponin T (hsTnT) values returned to normal within up to 58 hours after the marathon race in almost all athletes (95%). Creatine kinase (CK) remains elevated in all 21 athletes (with ST-segment deviation and/or hsTnT elevation).

**Table ONLINE SUPPLEMENT:** Characteristics of 21 athletes with either ST-segment deviation (>1 mm) and hsTnT elevation (≥50 ng/L) (n=5), ST-segment deviation (n=3) or hsTnT elevation (n=13). Pathological findings are labeled in bold.

| Age | Sex    | Medication       | Cardiovascular risk factors | NSVT <sup>§</sup> | ST-segment deviation | hsTnT <sup>§</sup> ng/L* | hsTnT ng/L** | CK-MB mg/dL* | CK-MB mg/dL** | CK mg/dL* | CK mg/dL** | Cardiac MRI |
|-----|--------|------------------|-----------------------------|-------------------|----------------------|--------------------------|--------------|--------------|---------------|-----------|------------|-------------|
| 45  | Female | None             | No                          | No                | <b>Yes</b>           | <b>91</b>                | 19           | 21           | 32            | 877       | 1194       | Yes         |
| 45  | Female | L-Thyroxin       | No                          | No                | <b>Yes</b>           | <b>71</b>                | 12           | 18           | 16            | 243       | 235        | Yes         |
| 53  | Male   | None             | No                          | No                | <b>Yes</b>           | <b>63</b>                | 14           | 14           | 35            | 893       | 2121       | Yes         |
| 59  | Male   | None             | No                          | No                | <b>Yes</b>           | <b>66</b>                | 12           | 19           | 54            | 406       | 2236       | Yes         |
| 60  | Male   | None             | Smoker                      | <b>Yes</b>        | <b>Yes</b>           | <b>70</b>                | 12           | 27           | 72            | 2867      | 3625       | Yes         |
| 48  | Male   | None             | No                          | No                | <b>Yes</b>           | 32                       | 16           | 18           | 44            | 381       | 1719       | No          |
| 55  | Male   | None             | No                          | No                | <b>Yes</b>           | 21                       | 12           | 21           | 35            | 201       | 489        | No          |
| 60  | Male   | Antihypertensive | Hypertension                | No                | <b>Yes</b>           | 27                       | 13           | 28           | 44            | 767       | 1979       | No          |
| 44  | Female | None             | Smoker                      | No                | No                   | <b>78</b>                | 12           | 26           | 20            | 306       | 192        | Yes         |
| 48  | Male   | None             | No                          | No                | No                   | <b>138</b>               | 20           | 59           | 67            | 325       | 2186       | Yes         |
| 49  | Female | None             | No                          | No                | No                   | <b>63</b>                | 12           | 22           | 41            | 205       | 1357       | Yes         |
| 50  | Male   | None             | No                          | No                | No                   | <b>87</b>                | 29           | 30           | 73            | 360       | 3462       | Yes         |
| 60  | Female | None             | No                          | No                | No                   | <b>216</b>               | 64           | 33           | 14            | 455       | 169        | Yes         |
| 39  | Male   | None             | No                          | No                | No                   | <b>59</b>                | 23           | 47           | 87            | 583       | 2756       | No          |
| 40  | Female | None             | No                          | No                | No                   | <b>85</b>                | 12           | 42           | 33            | 696       | 914        | No          |
| 45  | Male   | None             | No                          | No                | No                   | <b>83</b>                | 29           | 175          | 157           | 195       | 605        | No          |
| 47  | Male   | None             | No                          | No                | No                   | <b>52</b>                | 12           | 37           | 42            | 309       | 1983       | No          |
| 48  | Male   | None             | No                          | No                | No                   | <b>64</b>                | 12           | 52           | 101           | 405       | 4604       | No          |
| 50  | Female | Antihypertensive | Hypertension                | No                | No                   | <b>50</b>                | 12           | 29           | 28            | 315       | 485        | No          |
| 53  | Female | None             | No                          | No                | No                   | <b>62</b>                | 12           | 30           | 24            | 339       | 448        | No          |
| 54  | Male   | None             | No                          | No                | No                   | <b>67</b>                | 15           | 33           | 23            | 234       | 409        | No          |

<sup>§</sup> non-sustained ventricular tachycardia; <sup>§</sup> high-sensitive Troponin T; \* within 30 minutes post-race; \*\* up to 58 hours after the race
